# Supplementary material for: Genetic Structure Analysis of 155 Transboundary and Local Populations of Cattle (Bos taurus, Bos indicus and Bos grunniens) Based on STR Markers
Source: MDPI journal article supplement (doi:10.3390/ijms24055061), 2023-03-06
Supplement: s1 [file s1]

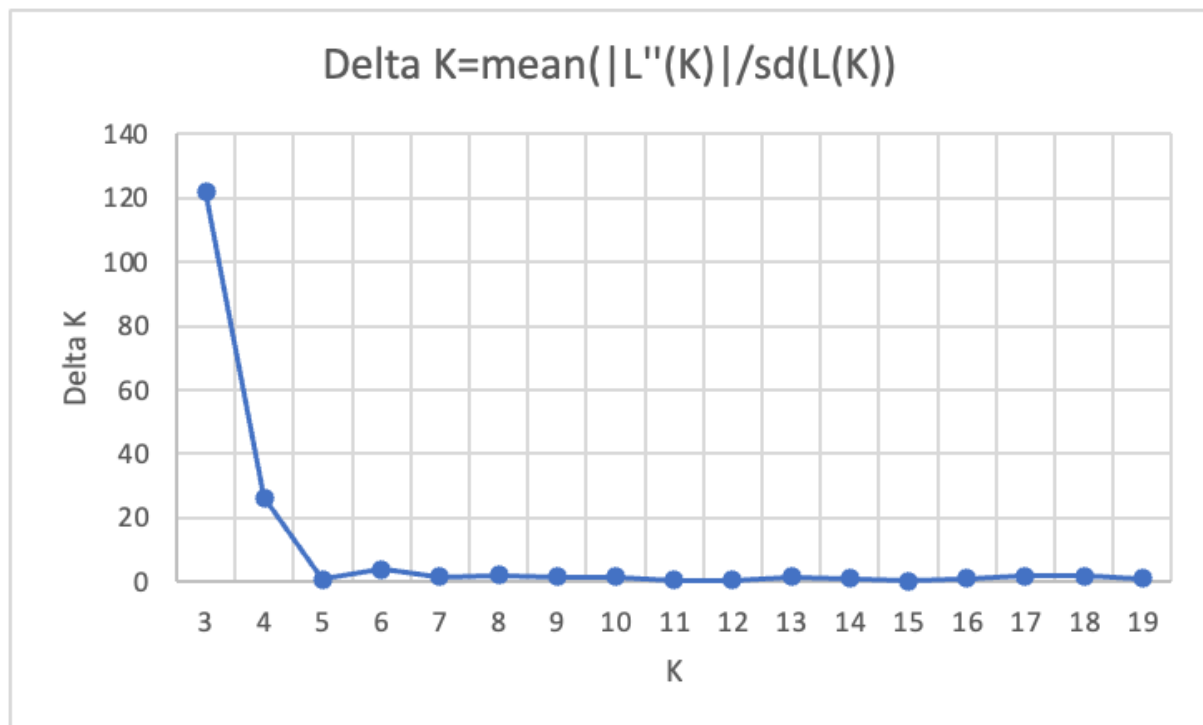

Figure S3: Values of the statistic  $\Delta K$  calculated by the method proposed by Evanno et al. for  $K$  from 2 to 20.
