# Supplementary material for: Genetic Structure Analysis of 155 Transboundary and Local Populations of Cattle (Bos taurus, Bos indicus and Bos grunniens) Based on STR Markers
Source: MDPI journal article supplement (doi:10.3390/ijms24055061), 2023-03-06
Supplement: s1 [file s1]

K2

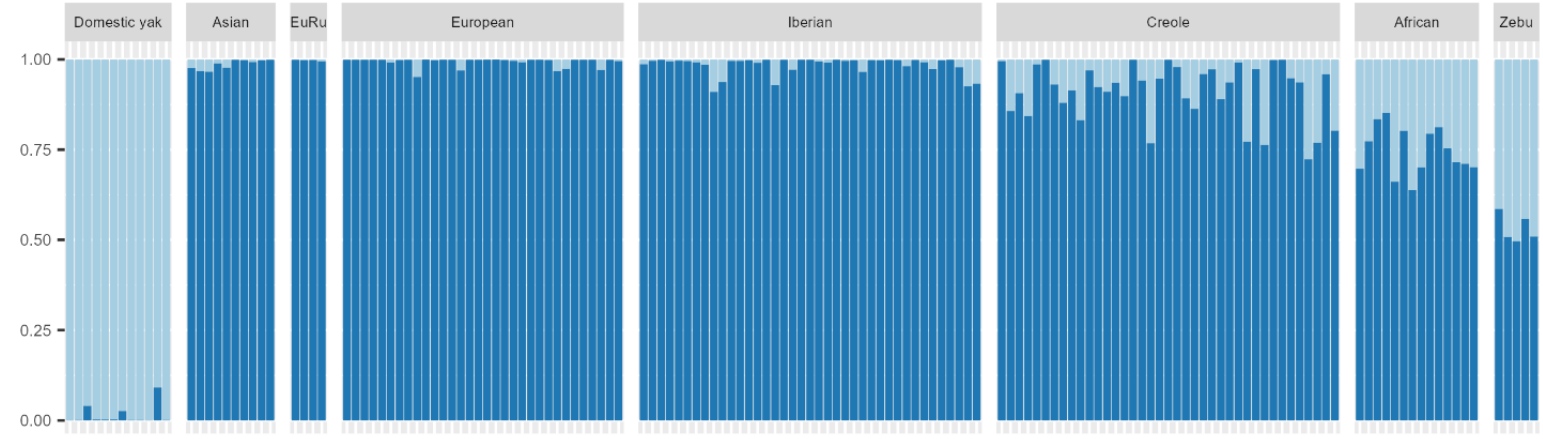

K3

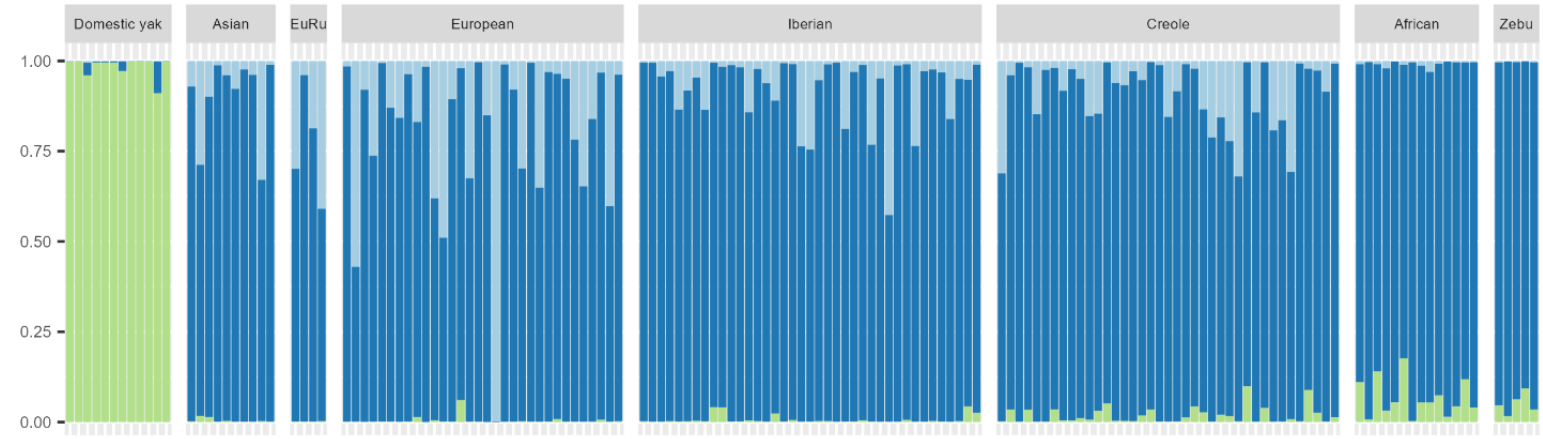

K4

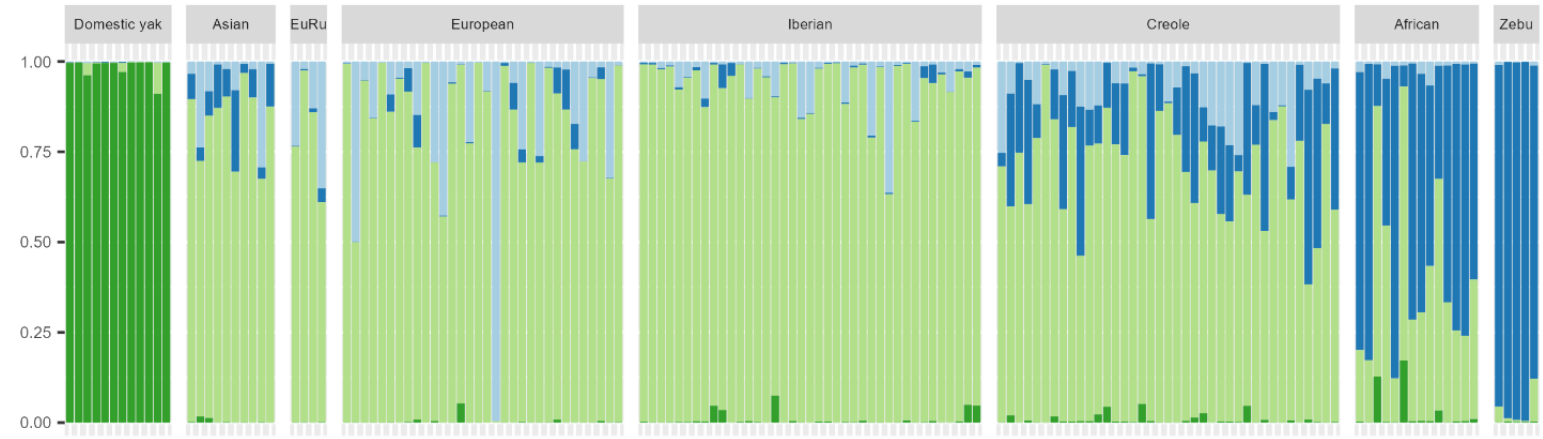

K5

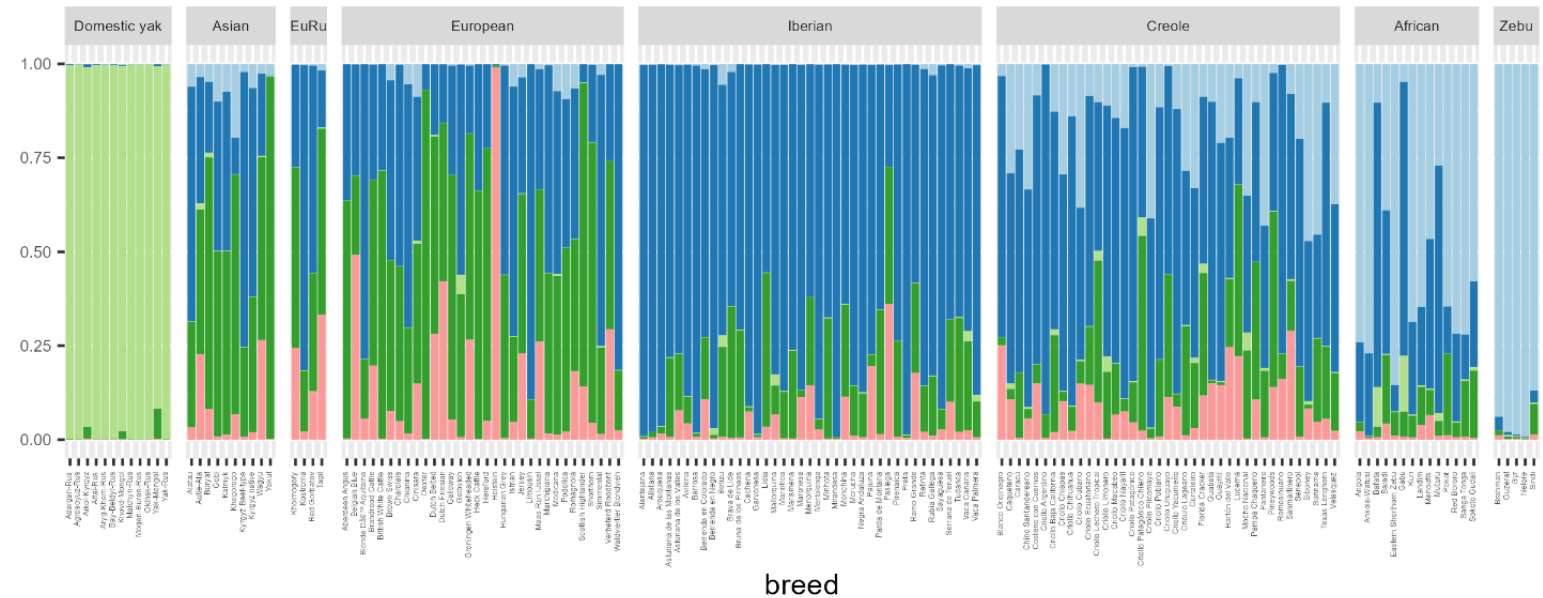

breed

K6

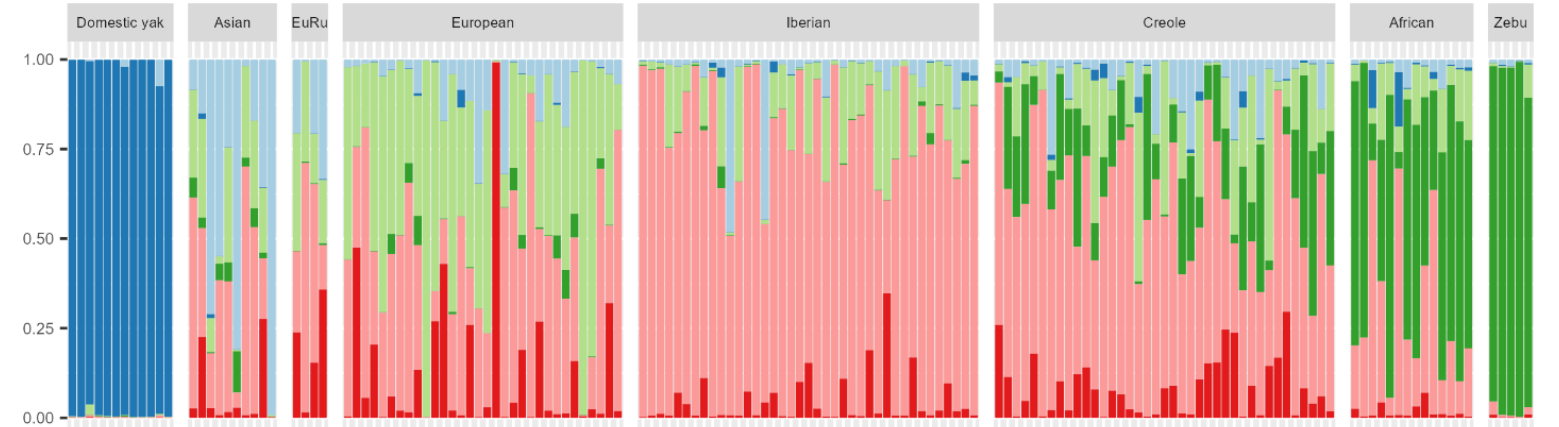

K7

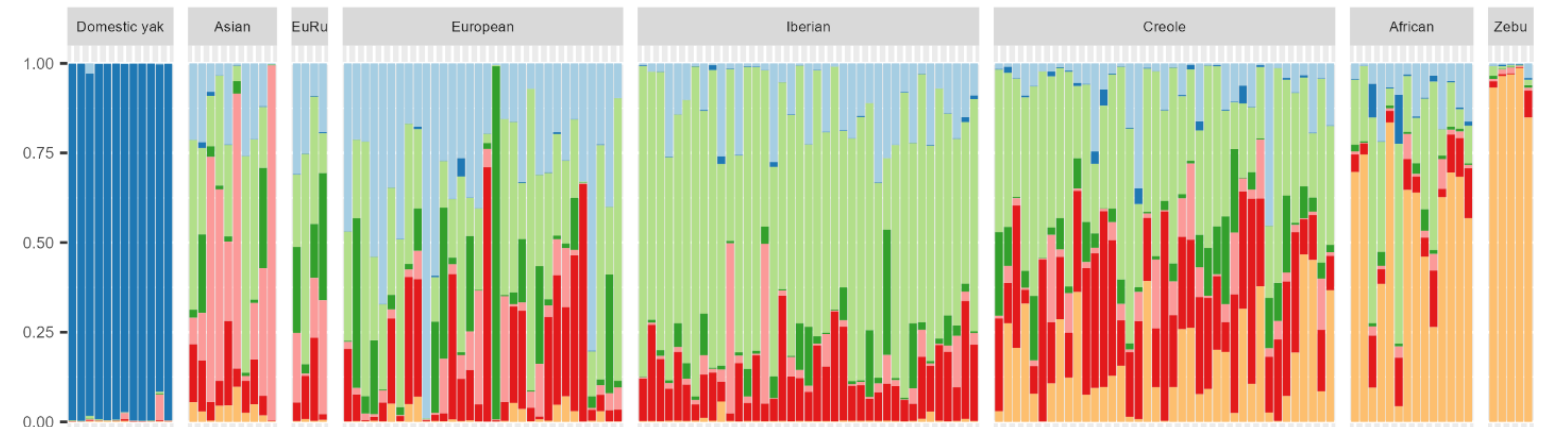

K8

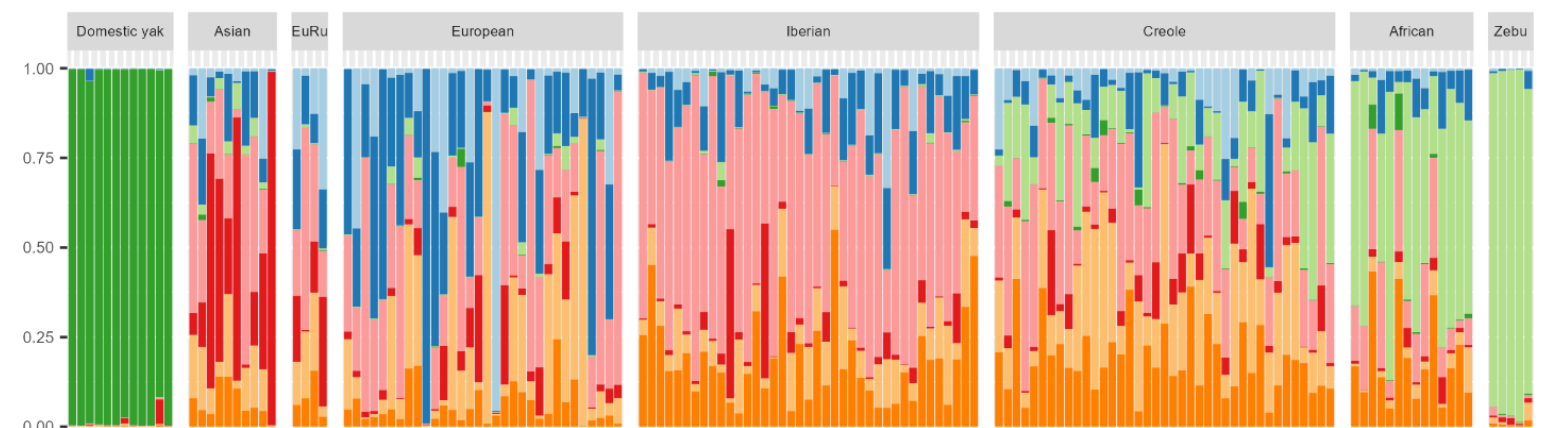

K9

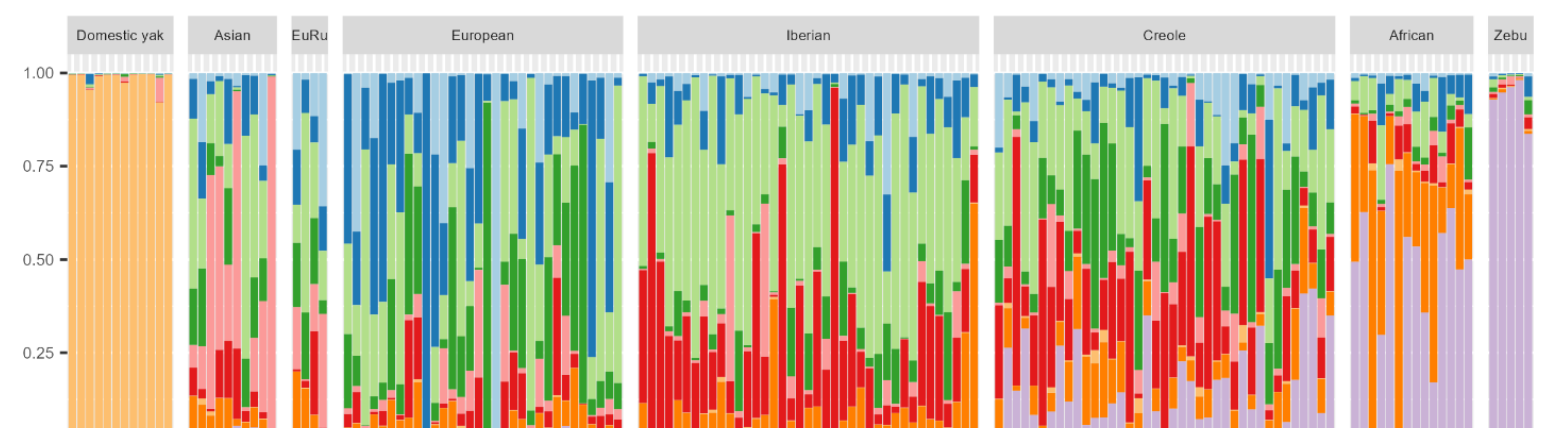

breed

K10

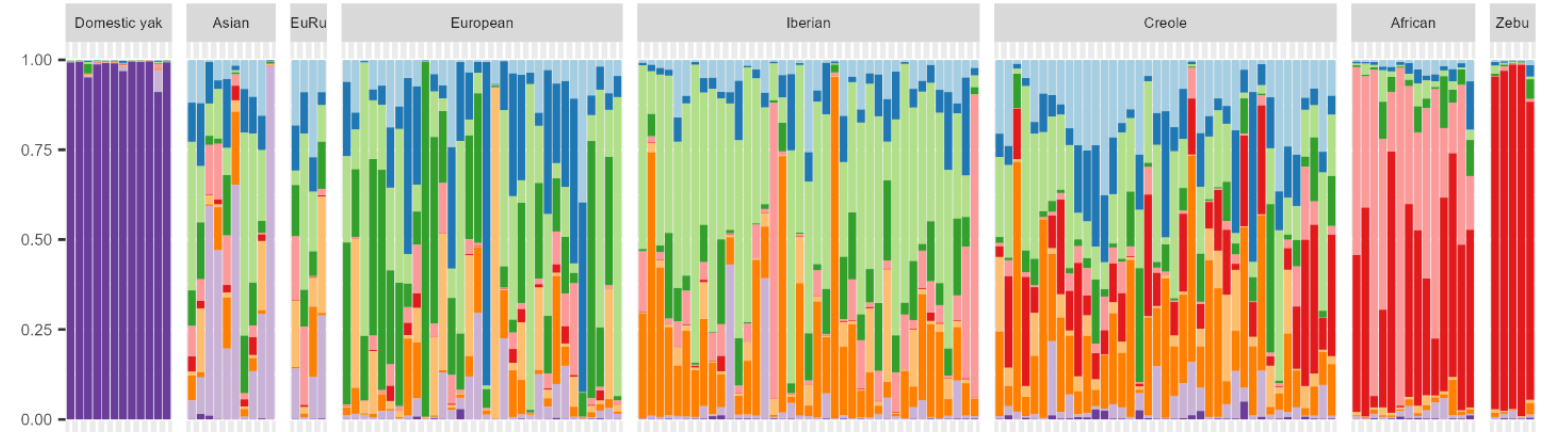

K11

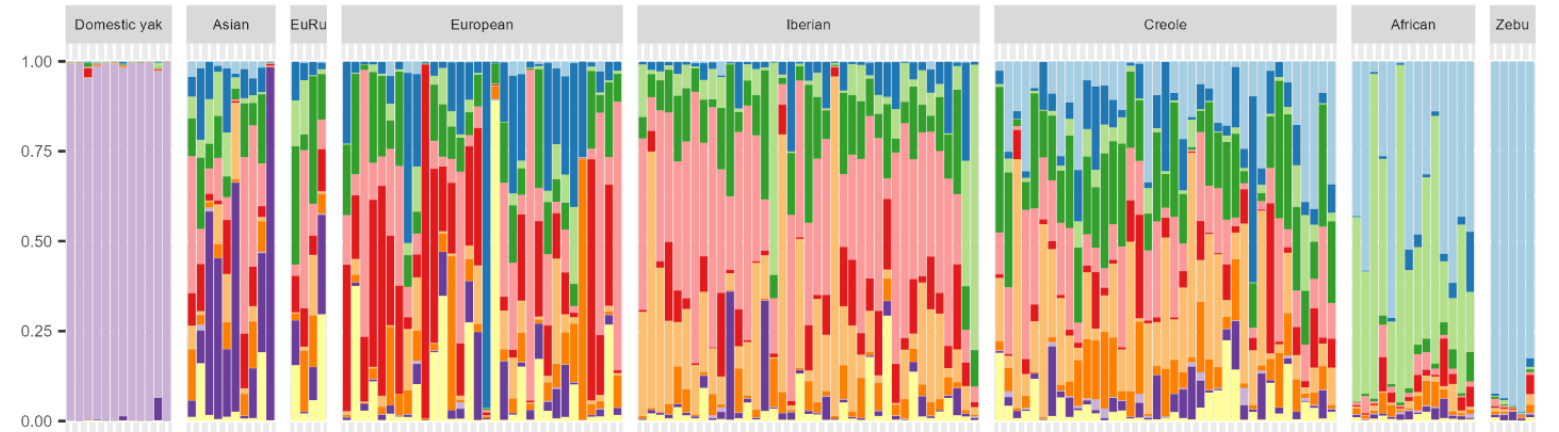

K12

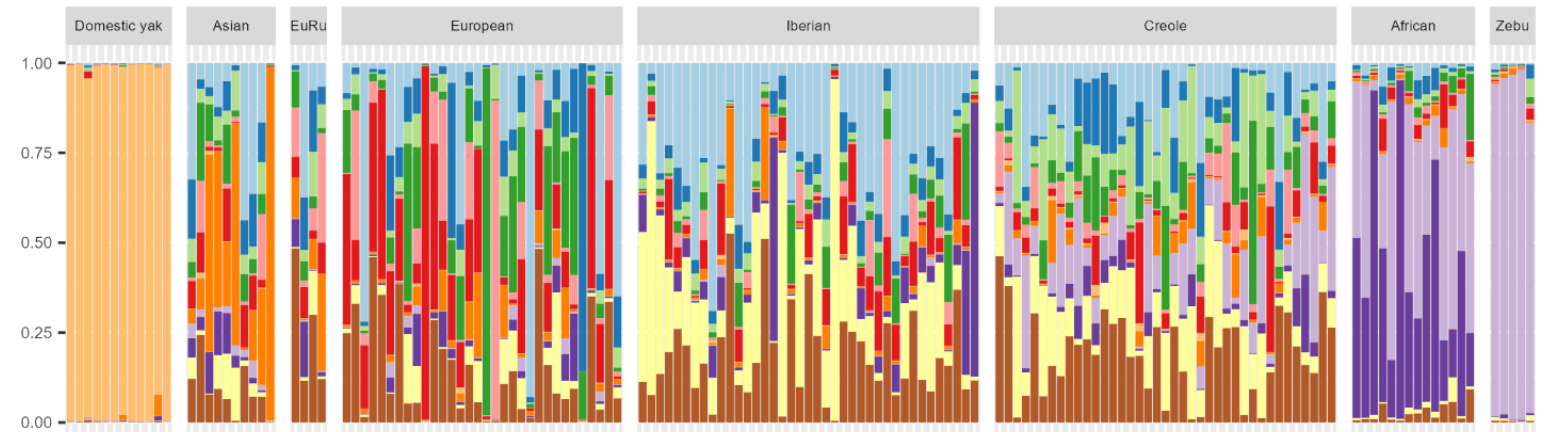

K13

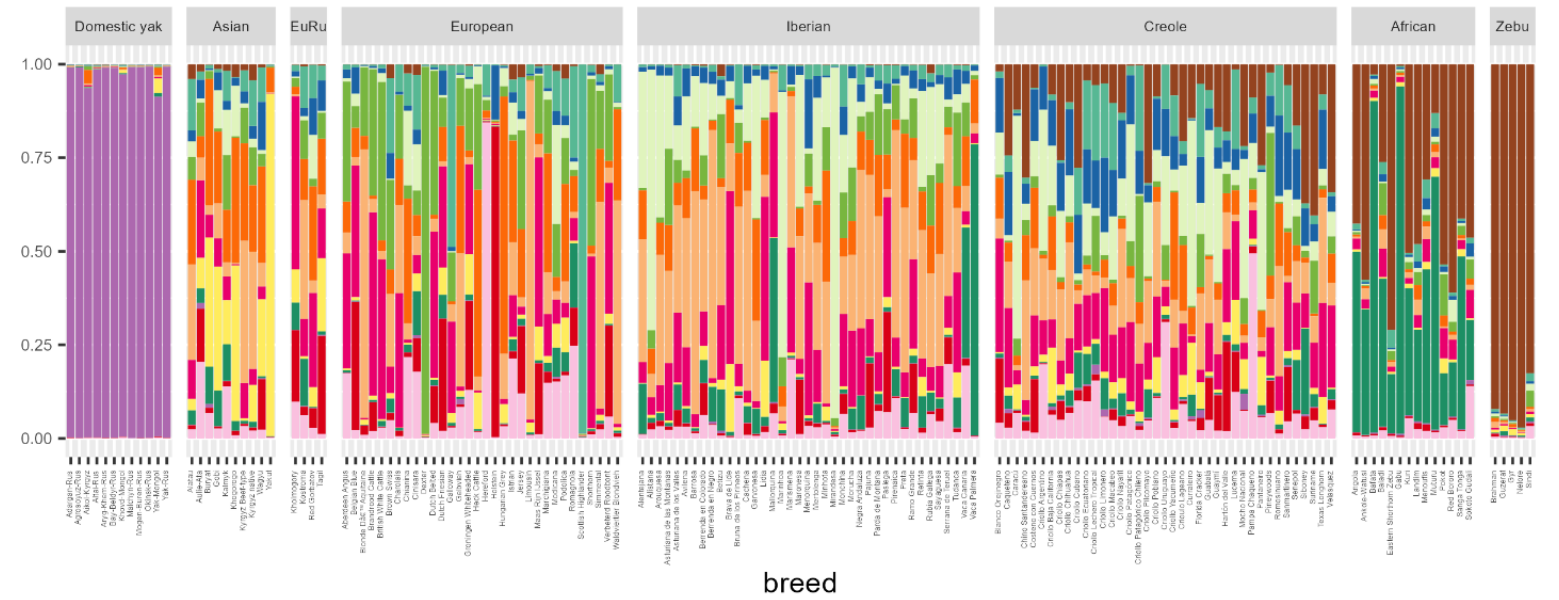

K14

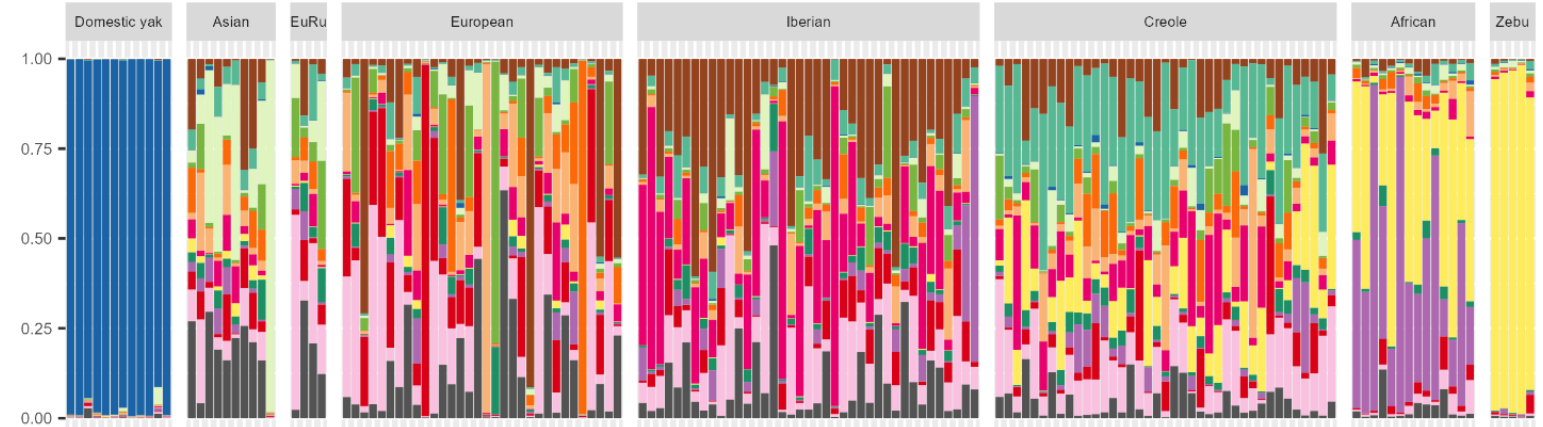

K15

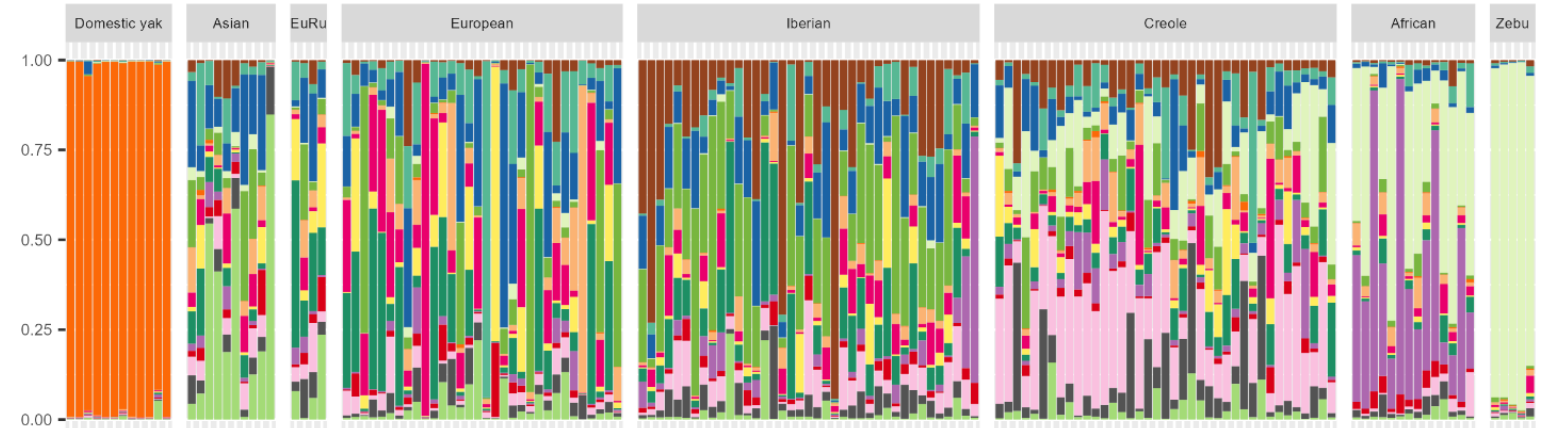

K16

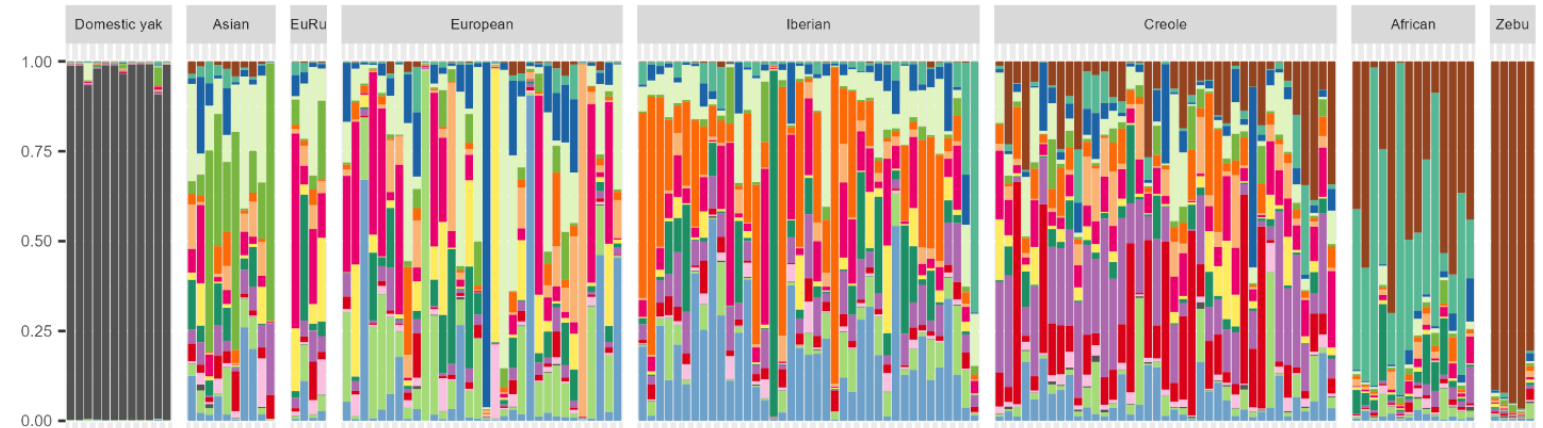

K17

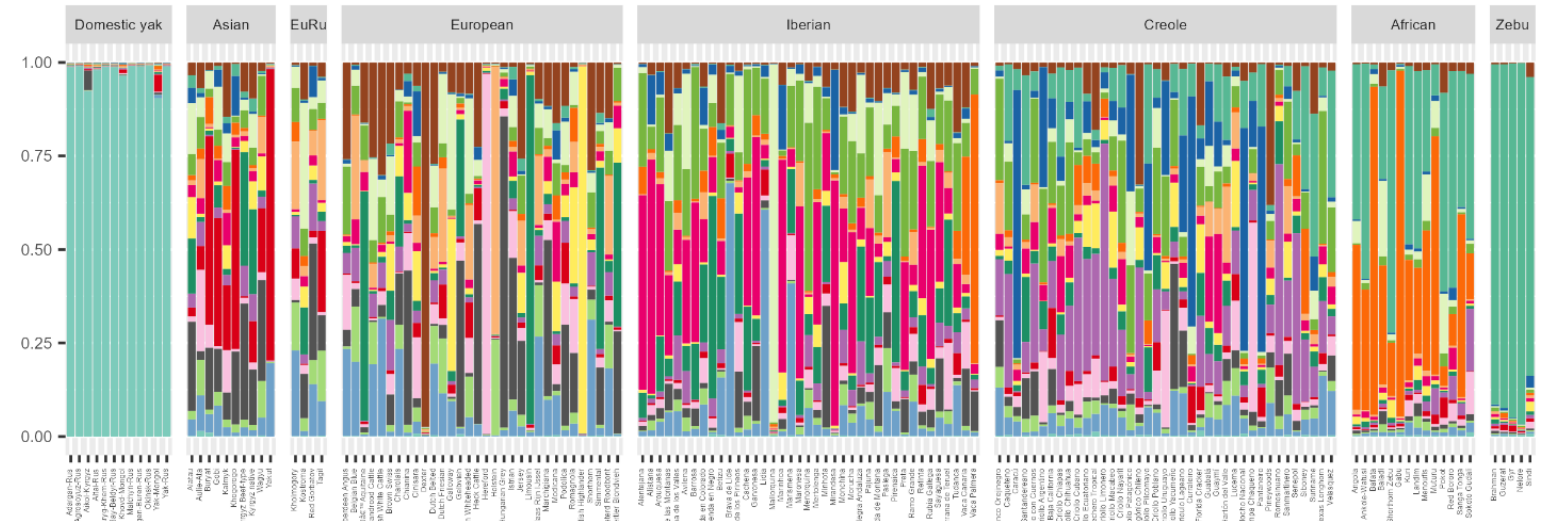

breed

K18

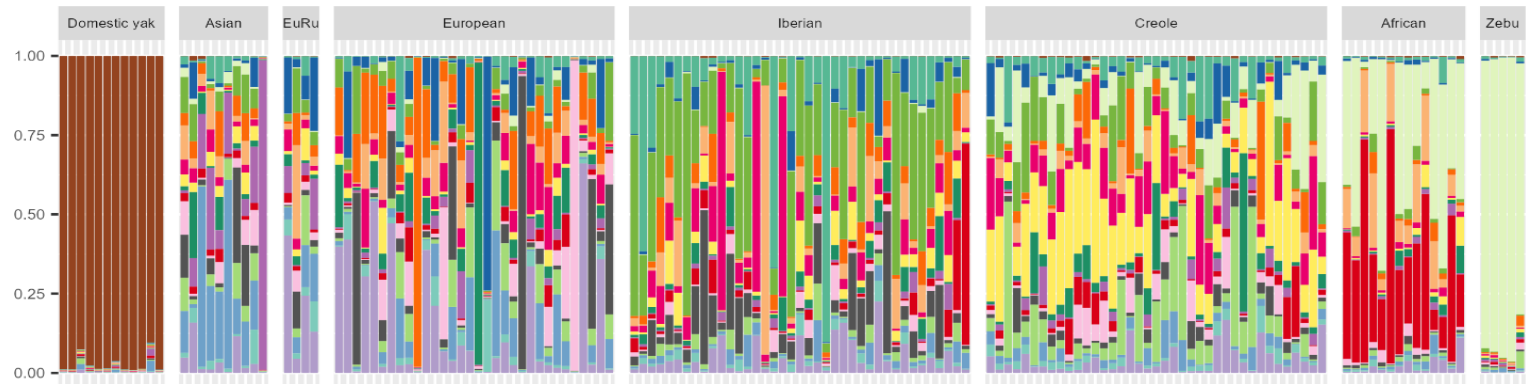

K19

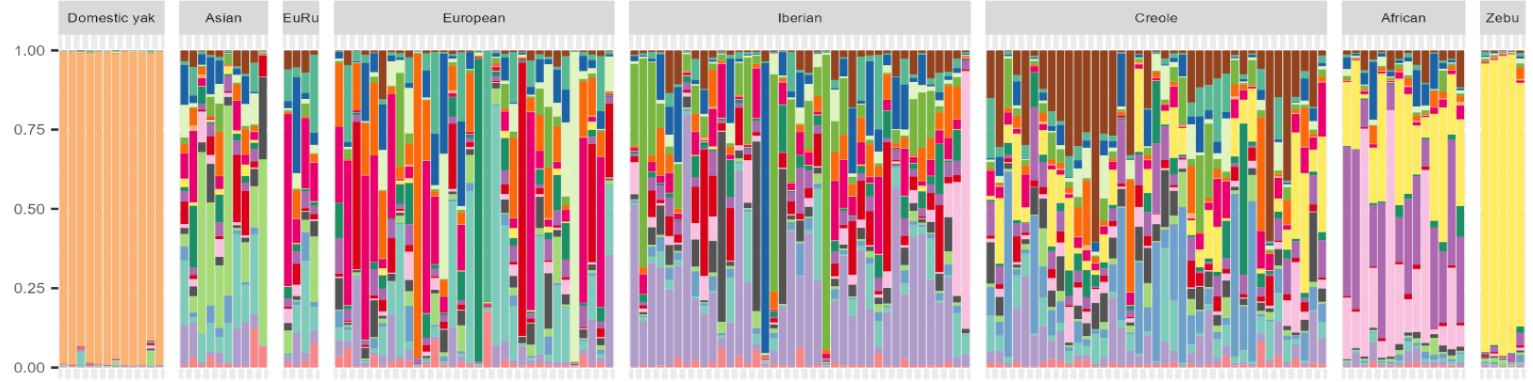

K20

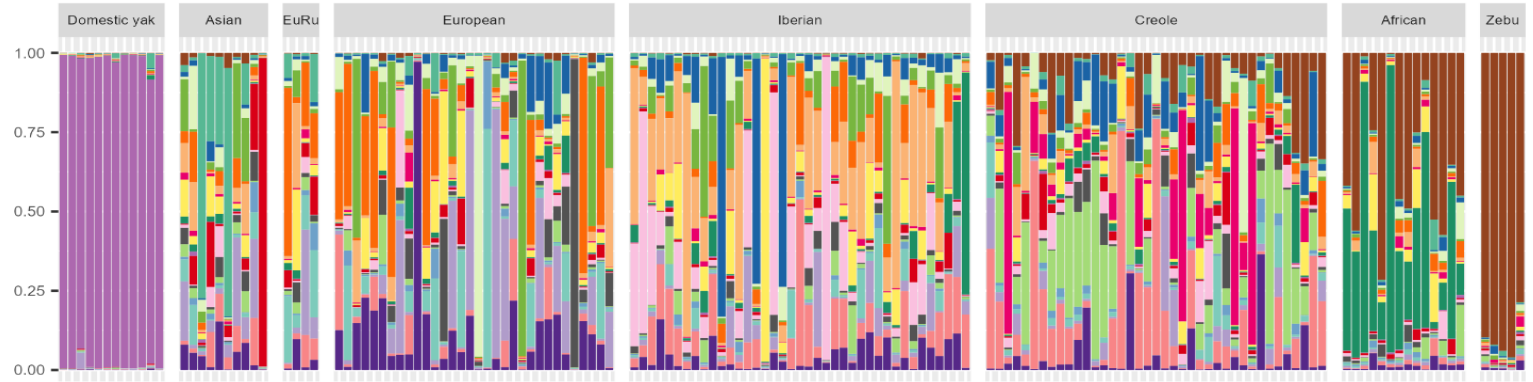

K30

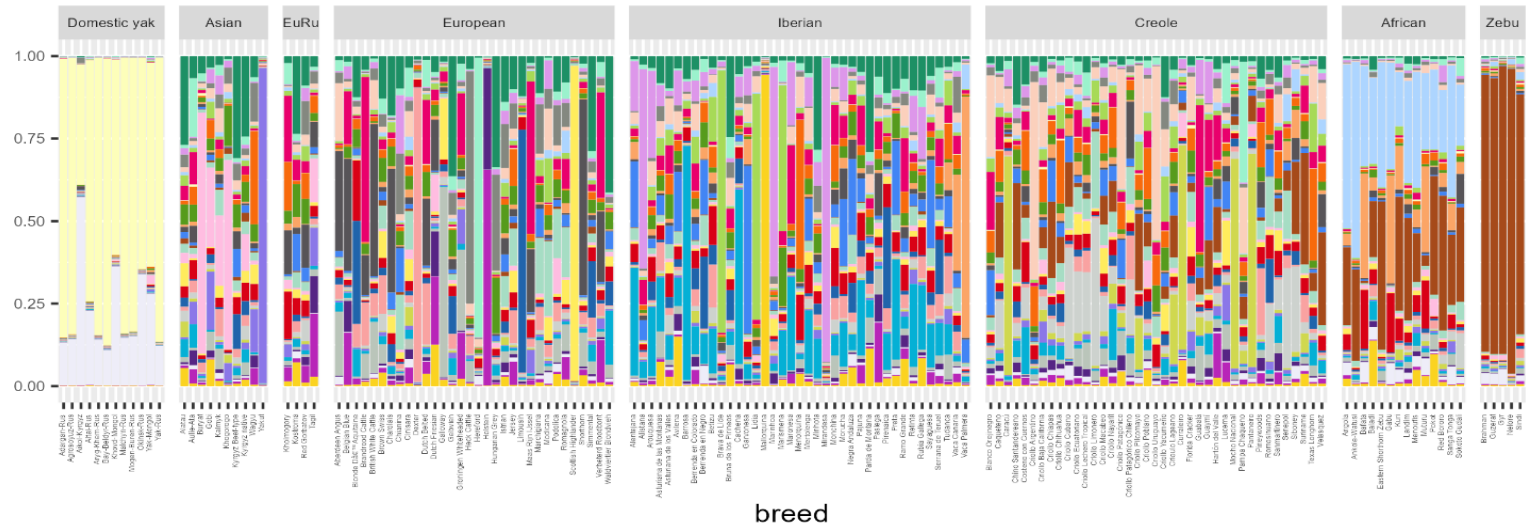

Figure S2: Cluster analysis of 155 cattle populations calculated from microsatellite data in STRUCTURE. Each individual breed is represented by a vertical bar divided into K colors according to the number of supposed ancestral populations. The size of the color segment is proportional to the contribution of a particular ancestral population to the genome of the breed in question. Results are presented for K from 2 to 20 and K=30.
