# Supplementary material for: Genetic Structure Analysis of 155 Transboundary and Local Populations of Cattle (Bos taurus, Bos indicus and Bos grunniens) Based on STR Markers
Source: MDPI journal article supplement (doi:10.3390/ijms24055061), 2023-03-06
Supplement: s1 [file s1]

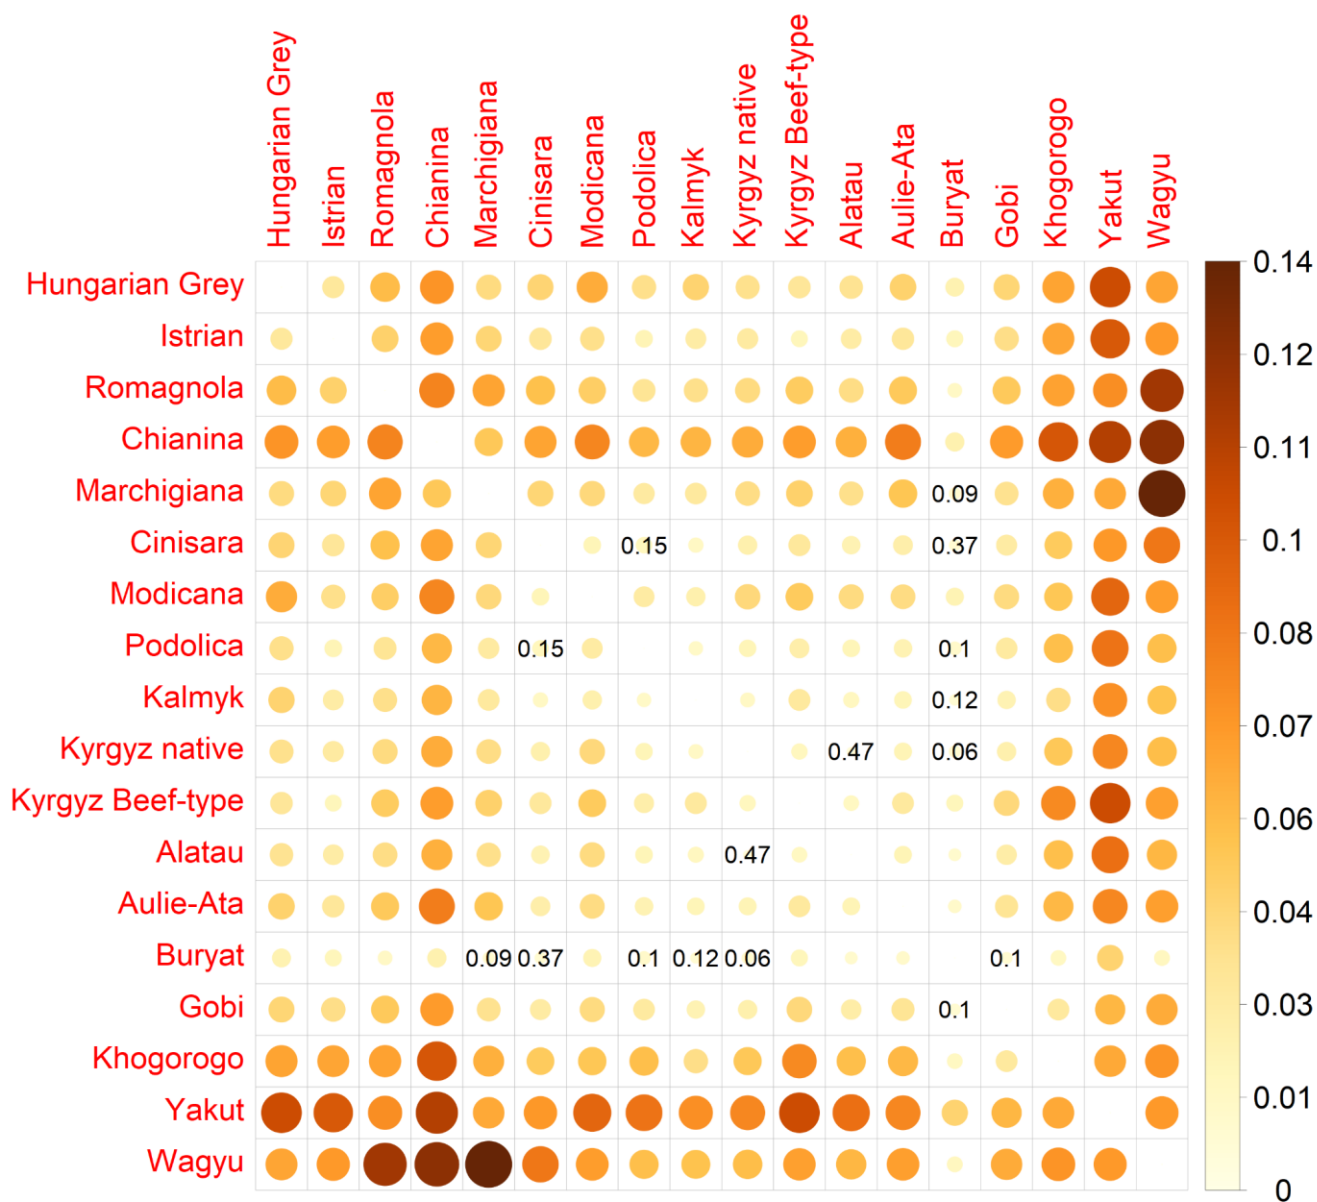

Figure S1: Correlation matrix for pairwise  $F_{st}$  values. Numbers added to the cells with p-value more than 0.05.
