# Supplementary material for: Genetic Structure Analysis of 155 Transboundary and Local Populations of Cattle (Bos taurus, Bos indicus and Bos grunniens) Based on STR Markers
Source: MDPI journal article supplement (doi:10.3390/ijms24055061), 2023-03-06
Supplement: s1 [file s1]

**Table S3:** Average values of standardized Indices of association between all loci for each population. Calculations were performed by the poppr::pair.ia () function.

| <b>Population name</b>    | <b>LD, Standardized Index of Association between all loci</b> |
|---------------------------|---------------------------------------------------------------|
| Limousin                  | 0                                                             |
| Siboney                   | 0.001                                                         |
| Criollo Limonero          | 0.001                                                         |
| Gabú                      | 0.002                                                         |
| Landim                    | 0.002                                                         |
| Yak-Rus                   | 0.002                                                         |
| Verbeterd Roodbont        | 0.003                                                         |
| Hereford                  | 0.003                                                         |
| Charolais                 | 0.003                                                         |
| Asturiana de las Montañas | 0.004                                                         |
| Belgian Blue              | 0.004                                                         |
| Holstein                  | 0.004                                                         |
| Baladi                    | 0.004                                                         |
| Cachena                   | 0.004                                                         |
| Criollo Cubano            | 0.004                                                         |
| Blonde D'Aquitaine        | 0.004                                                         |
| Cinisara                  | 0.005                                                         |
| Kalmyk                    | 0.005                                                         |
| Chianina                  | 0.005                                                         |
| Rubia Gallega             | 0.005                                                         |
| Pirenaica                 | 0.005                                                         |
| Shorthorn                 | 0.005                                                         |
| Barrosã                   | 0.005                                                         |
| Arouquesa                 | 0.005                                                         |
| Bruna de los Pirineos     | 0.005                                                         |
| Agrosoyuz-Rus             | 0.005                                                         |
| Aryg-Khem-Rus             | 0.006                                                         |
| Kyrgyz native             | 0.006                                                         |
| Hartón del Valle          | 0.006                                                         |
| Morucha                   | 0.006                                                         |
| Minhota                   | 0.006                                                         |
| Pampa Chaqueño            | 0.006                                                         |
| Criollo Yacumeño          | 0.006                                                         |
| Modicana                  | 0.006                                                         |
| Asturiana de los Valles   | 0.007                                                         |
| Alentejana                | 0.007                                                         |
| Avileña                   | 0.007                                                         |
| Vaca Canaria              | 0.008                                                         |
| Caracú                    | 0.008                                                         |

|                        |       |
|------------------------|-------|
| Alatau                 | 0.008 |
| Dexter                 | 0.008 |
| Maronesa               | 0.008 |
| Hungarian Grey         | 0.008 |
| Eastern Shorthorn Zebu | 0.008 |
| Caqueteño              | 0.009 |
| Criollo Patagónico     | 0.009 |
| Monchina               | 0.009 |
| Marinhua               | 0.01  |
| Kholmogory             | 0.01  |
| Tagil                  | 0.01  |
| Aberdeen Angus         | 0.01  |
| Texas Longhorn         | 0.011 |
| Nelore                 | 0.011 |
| Vaca Palmera           | 0.011 |
| Criollo Pilcomayo      | 0.012 |
| Adargan-Rus            | 0.012 |
| Parda de Montaña       | 0.012 |
| Podolica               | 0.012 |
| Menoufis               | 0.012 |
| Aikol-Kyrgyz           | 0.012 |
| Pokot                  | 0.013 |
| Brava de Lide          | 0.013 |
| Menorquina             | 0.014 |
| Guaymí                 | 0.014 |
| Lidia                  | 0.014 |
| Senepol                | 0.015 |
| Malchyn-Rus            | 0.015 |
| Okinsk-Rus             | 0.015 |
| Brown Swiss            | 0.015 |
| Romagnola              | 0.015 |
| Curraleiro             | 0.015 |
| Pantaneiro             | 0.016 |
| Yakut                  | 0.017 |
| Istrian                | 0.018 |
| Retinta                | 0.018 |
| Criollo Ecuatoriano    | 0.018 |
| Guzerat                | 0.018 |
| Red Gorbato            | 0.018 |
| Sayaguesa              | 0.019 |
| Brahman                | 0.019 |
| Suriname               | 0.02  |
| Waldviertler Blondvieh | 0.021 |
| Gelbvieh               | 0.021 |
| British White Cattle   | 0.021 |
| Criollo Poblano        | 0.021 |

|                          |       |
|--------------------------|-------|
| Mertolenga               | 0.021 |
| Heck Cattle              | 0.021 |
| Mocho Nacional           | 0.021 |
| Maas Rijn IJssel         | 0.022 |
| Preta                    | 0.022 |
| Wagyu                    | 0.022 |
| Tudanca                  | 0.023 |
| Alistana                 | 0.024 |
| Bay-Beldyr-Rus           | 0.024 |
| Lucerna                  | 0.024 |
| Buryat                   | 0.025 |
| Berrenda en Colorado     | 0.025 |
| Sindi                    | 0.025 |
| Simmental                | 0.025 |
| Angola                   | 0.025 |
| Costeño con Cuernos      | 0.026 |
| Pasiega                  | 0.026 |
| Criollo Uruguayo         | 0.027 |
| Bafatá                   | 0.029 |
| Groningen Whiteheaded    | 0.03  |
| Ankole-Watusi            | 0.031 |
| Mogen-Buren-Rus          | 0.031 |
| Kyrgyz Beef-type         | 0.031 |
| Criollo Lechero Tropical | 0.031 |
| Guabalá                  | 0.032 |
| Criollo Nayarit          | 0.032 |
| Chino Santandereano      | 0.033 |
| Khovd-Mongol             | 0.034 |
| Blanco Orejinegro        | 0.034 |
| Brandrood Cattle         | 0.034 |
| Velasquez                | 0.035 |
| Romosinuano              | 0.035 |
| Mirandesa                | 0.036 |
| Criollo Argentino        | 0.036 |
| Ramo Grande              | 0.038 |
| Serrana de Teruel        | 0.038 |
| Criollo Chiapas          | 0.038 |
| Mallorquina              | 0.039 |
| Gyr                      | 0.039 |
| Dutch Friesian           | 0.039 |
| Gobi                     | 0.04  |
| Khogorogo                | 0.041 |
| Dutch Belted             | 0.041 |
| Red Bororo               | 0.041 |
| Pajuna                   | 0.041 |
| Criollo Macabeo          | 0.042 |

|                         |       |
|-------------------------|-------|
| Aulie-Ata               | 0.042 |
| Betizu                  | 0.044 |
| Crioulo Lagueano        | 0.044 |
| Jersey                  | 0.045 |
| Garvonesa               | 0.045 |
| Scottisch Highlander    | 0.045 |
| Marismeña               | 0.049 |
| Florida Cracker         | 0.051 |
| Kostroma                | 0.051 |
| Criollo Chihuahua       | 0.051 |
| Criollo Patagónico      | 0.052 |
| Chileno                 | 0.052 |
| Criollo Baja California | 0.064 |
| Marchigiana             | 0.067 |
| Altai-Rus               | 0.074 |
| Galloway                | 0.076 |
| Sokoto Gudali           | 0.082 |
| Pineywoods              | 0.086 |
| Muturu                  | 0.086 |
| Sanmartinero            | 0.088 |
| Sanga Tonga             | 0.088 |
| Negra Andaluza          | 0.1   |
| Yak-Mongol              | 0.103 |
| Kuri                    | 0.123 |
| Berrenda en Negro       | 0.203 |

---

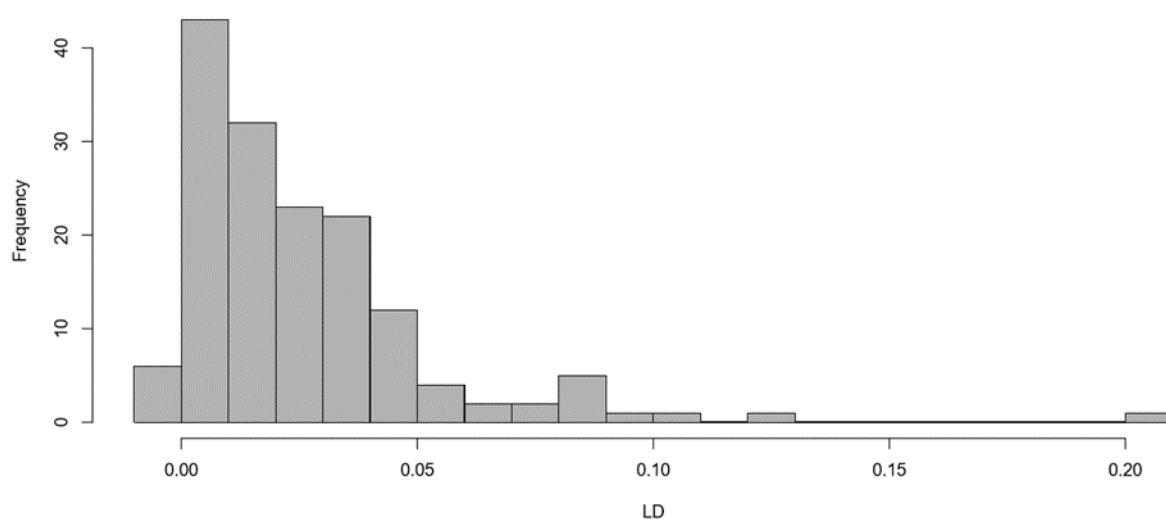

Figure S4. Distribution of Average values of standardized Indices of association among populations.
