# Supplementary material for: Genetic Structure Analysis of 155 Transboundary and Local Populations of Cattle (Bos taurus, Bos indicus and Bos grunniens) Based on STR Markers
Source: Int J Mol Sci. 2023 Mar 6;24(5):5061. doi: 10.3390/ijms24055061 (PMC10003406; doi:10.3390/ijms24055061)
Supplement: Supplementary file 1 [file ijms-24-05061-s001.zip]

Archive with 6 entries (6 files):
- Figure S1.pdf
- Figure S2. Cluster analysis of 155 cattle populations  for K from 2 to 20 and K=30.pdf
- Figure S3.pdf
- Table S1.xlsx
- Table S2.xlsx
- Table S3 and Figure S4.pdf
