# Supplementary material for: Genetic Structure Analysis of 155 Transboundary and Local Populations of Cattle (Bos taurus, Bos indicus and Bos grunniens) Based on STR Markers
Source: Int J Mol Sci. 2023 Mar 6;24(5):5061. doi: 10.3390/ijms24055061 (PMC10003406; doi:10.3390/ijms24055061)
Supplement: Supplementary file 1 [file ijms-24-05061-s001.zip › Table S1.xlsx]

## Sheet: AFP
Allele Frequencies by Population for Codominant Data
No. Loci	12
No. Samples	10250
No. Pops.	155
Allele Frequencies and Sample Size by Populations
Locus	Allele/n	Holstein	Tagil	Kholmogory	Red Gorbatov	Brown Swiss	Kostroma	Altai-Rus	Kalmyk	Aulie-Ata	Alatau	Kyrgyz Beef-type	Kyrgyz native	Yakut	Khogorogo	Gobi	Buryat	Blonde D’Aquitaine	Belgian Blue	Brandrood Cattle	Charolais	Dexter	Dutch Friesian	Groningen Whiteheaded	Galloway	Heck Cattle	Hereford	Limousin	Dutch Belted	Marchigiana	Maas Rijn IJssel	Scottisch Highlander	Verbeterd Roodbont	Wagyu	Waldviertler Blondvieh	Chianina	Romagnola	Modicana	Hungarian Grey	Istrian	Podolica	Cinisara	Texas Longhorn	Florida Cracker	Pineywoods	Criollo Lechero Tropical	Criollo Poblano	Criollo Baja California	Criollo Chihuahua
Eth3	N	2746	49	50	50	44	20	12	52	41	49	47	49	99	50	49	279	150	45	38	78	291	40	20	59	39	142	158	22	14	37	85	38	15	45	29	24	49	60	45	50	26	79	50	49	36	38	14	12
	101	0	0	0	0	0	0	0	0	0	0	0	0	0	0	0	0	0	0	0	0	0	0	0	0	0	0	0	0	0	0	0	0	0	0	0	0	0	0	0	0	0	0	0	0	0	0	0	0
	103	0	0	0	0	0	0	0	0	0.0122	0.0102	0	0	0	0	0.03061	0	0	0	0	0	0	0	0	0	0	0	0	0	0	0	0	0	0	0	0	0	0	0	0	0	0	0	0	0	0	0	0.03571	0.08333
	105	0	0	0	0	0	0	0	0	0	0	0	0	0	0	0	0	0	0	0	0	0	0	0	0	0	0	0	0	0	0	0	0	0	0	0	0	0	0	0	0	0	0	0	0	0	0	0	0
	107	0	0	0	0	0	0	0	0	0	0	0	0	0	0	0	0	0	0	0	0	0	0	0	0	0	0	0	0	0	0	0	0	0	0	0	0	0	0	0	0	0	0	0	0	0	0	0	0
	109	0	0	0	0.08	0	0	0	0.00962	0	0.03061	0	0.03061	0	0	0	0	0	0.14444	0	0	0	0.025	0	0	0.12821	0	0	0	0	0	0	0.03947	0	0.06667	0.08621	0	0.09184	0.26667	0.04444	0.03	0.03846	0.06962	0.04	0	0.04167	0.06579	0.03571	0.04167
	111	0	0	0	0	0	0	0	0	0	0	0	0.0102	0	0.04	0	0.00179	0	0	0	0	0	0	0	0	0	0	0	0	0	0	0	0	0	0	0	0	0	0	0	0	0	0	0	0	0	0	0	0
	113	0	0	0	0	0	0	0	0	0	0	0	0	0	0	0	0	0	0	0	0	0	0	0	0	0	0	0	0	0	0	0	0	0	0	0	0	0	0	0	0.02	0	0	0	0	0	0	0	0
	115	0	0.0102	0	0.01	0.03409	0	0	0.05769	0.02439	0.02041	0.01064	0.02041	0.00505	0	0.02041	0.03763	0	0	0	0	0	0	0	0	0	0	0	0	0	0	0	0	0	0	0.08621	0.04167	0.06122	0	0.03333	0.13	0.05769	0.00633	0.06	0.02041	0.04167	0.07895	0	0.04167
	117	0.53532	0.46939	0.4	0.31	0.54545	0.475	0	0.31731	0.39024	0.38776	0.56383	0.39796	0.17677	0.22	0.38776	0.29928	0.43333	0.31111	0.77632	0.44872	0.53265	0.525	0.425	0.77119	0.14103	0.46831	0.52532	0.72727	0.60714	0.33784	0.57647	0.44737	0.16667	0.54444	0.39655	0.83333	0.2551	0.45833	0.47778	0.49	0.40385	0.51899	0.24	0.26531	0.375	0.36842	0.21429	0.29167
	119	0.00783	0.23469	0.2	0.2	0.11364	0	0	0.23077	0.10976	0.09184	0.07447	0.12245	0.37879	0.51	0.20408	0.29032	0.22333	0.12222	0.07895	0.05128	0.12715	0.1125	0.025	0.0678	0.5	0.50704	0.18671	0	0.25	0.12162	0.17059	0.07895	0.6	0.1	0.37931	0.04167	0.21429	0	0.16667	0.16	0.23077	0.14557	0.06	0.17347	0.04167	0.19737	0.21429	0.20833
	121	0.00947	0.10204	0.2	0.05	0.02273	0.025	0	0.03846	0.04878	0.09184	0.06383	0.04082	0	0	0	0.07706	0	0.13333	0.05263	0.07692	0.08419	0.1875	0.075	0.10169	0	0	0	0.22727	0.07143	0.14865	0.15882	0.10526	0.06667	0	0	0	0.0102	0.03333	0.03333	0	0	0.07595	0.09	0.17347	0.06944	0	0.03571	0
	123	0	0	0	0	0	0	0.125	0.01923	0	0.02041	0.01064	0	0	0	0	0.00717	0.02333	0.02222	0	0.01923	0.02405	0	0	0	0	0	0.02532	0	0	0	0	0	0	0	0	0	0.02041	0	0.04444	0	0.05769	0.00633	0.04	0.02041	0.01389	0.06579	0.17857	0.20833
	125	0.0732	0.03061	0.07	0.33	0.15909	0.475	0.125	0.24038	0.20732	0.27551	0.24468	0.33673	0.0303	0.2	0.27551	0.22581	0.23	0.12222	0.06579	0.36538	0.15464	0.0875	0.225	0.05932	0	0.00704	0.16456	0	0	0.25676	0.09412	0.07895	0.13333	0.27778	0	0.08333	0.04082	0.23333	0.11111	0.06	0.07692	0.16456	0.21	0.32653	0.27778	0.21053	0.10714	0.125
	127	0.14057	0.15306	0.09	0.02	0.05682	0	0	0.07692	0.20732	0.04082	0.03191	0.03061	0.40404	0.03	0.08163	0.0448	0.09	0.03333	0.02632	0.03205	0.07732	0.025	0.25	0	0.23077	0	0.08228	0.04545	0.07143	0.12162	0	0.25	0.03333	0.01111	0	0	0.30612	0.00833	0.02222	0.11	0.13462	0	0.15	0.02041	0	0.01316	0.07143	0
	129	0.22178	0	0.04	0	0.04545	0	0.75	0.00962	0	0.0102	0	0	0.00505	0	0	0.01613	0	0.11111	0	0.00641	0	0.0375	0	0	0	0.01761	0.00633	0	0	0.01351	0	0	0	0	0.05172	0	0	0	0.06667	0	0	0.01266	0.1	0	0.13889	0	0.10714	0
	131	0.01184	0	0	0	0.02273	0.025	0	0	0	0.02041	0	0.0102	0	0	0	0	0	0	0	0	0	0	0	0	0	0	0.00949	0	0	0	0	0	0	0	0	0	0	0	0	0	0	0	0.01	0	0	0	0	0
Cssm66	N	2746	49	50	50	42	20	12	52	41	49	47	49	99	50	49	276	150	45	38	78	291	40	20	59	39	141	158	22	14	37	85	38	15	45	28	24	49	60	44	50	26	79	50	49	37	35	11	11
	175	0	0	0	0	0	0	0	0	0	0	0	0	0	0	0	0	0	0	0	0	0	0	0	0	0	0	0	0	0	0	0	0	0	0	0	0	0	0	0	0	0	0	0	0	0	0	0	0
	177	0	0	0	0	0	0	0	0	0	0	0	0	0	0	0	0.00181	0	0	0	0	0	0	0	0	0	0	0	0	0	0	0	0	0	0	0	0	0	0	0	0	0	0	0	0	0	0	0	0
	179	0.02349	0.08163	0.13	0.24	0.08333	0.075	0	0.03846	0.15854	0.08163	0.05319	0.10204	0.43434	0.27	0.29592	0.09964	0.03333	0.05556	0.03947	0.00641	0.01031	0.025	0.075	0.05085	0.10256	0.00355	0.13608	0	0	0.13514	0	0.05263	0.5	0.13333	0.05357	0	0.08163	0.18333	0.02273	0.07	0	0.26582	0.14	0.07143	0.01351	0.05714	0.09091	0.09091
	181	0.03223	0.02041	0	0	0.14286	0.25	0	0.05769	0.03659	0.07143	0.02128	0.07143	0	0.06	0.05102	0.03623	0	0.14444	0.01316	0	0.00515	0	0	0.05085	0	0	0	0	0	0	0	0	0	0	0.01786	0.02083	0.09184	0	0.05682	0.01	0.03846	0.11392	0.16	0.03061	0.01351	0.12857	0.22727	0.09091
	183	0.09141	0.16327	0.34	0.18	0.03571	0	0	0.19231	0.12195	0.07143	0.05319	0.07143	0.01515	0.22	0.10204	0.17935	0.18333	0.2	0.11842	0.12179	0.08419	0.125	0.05	0.00847	0.15385	0.10638	0.06013	0.02273	0	0.36486	0	0.17105	0.33333	0.11111	0	0.0625	0.03061	0.13333	0.05682	0.12	0.05769	0.15823	0.13	0.15306	0.02703	0.18571	0.04545	0.13636
	185	0.22724	0.23469	0.14	0.05	0.28571	0.15	0	0.25962	0.09756	0.33673	0.25532	0.32653	0.33333	0.13	0.20408	0.38043	0.21667	0.15556	0.01316	0.36538	0.37801	0.375	0.225	0.29661	0.48718	0.12766	0.32595	0.02273	0.5	0.10811	0.44706	0.09211	0.06667	0.38889	0.75	0.3125	0.07143	0.30833	0.15909	0.27	0.34615	0.03797	0.17	0.13265	0.27027	0.07143	0.09091	0.09091
	187	0.06956	0.08163	0.12	0.17	0.08333	0.05	0.20833	0.17308	0.10976	0.03061	0.10638	0.03061	0.21717	0	0	0.03261	0.00667	0.07778	0	0.03205	0.07216	0.0875	0.15	0.08475	0	0.2234	0	0	0.14286	0.05405	0.30588	0.14474	0.1	0.06667	0.01786	0.3125	0.2449	0.00833	0.10227	0.06	0.09615	0.03165	0.18	0.07143	0.17568	0.01429	0.09091	0
	189	0.36526	0.2449	0	0.24	0.0119	0.175	0.29167	0.125	0.17073	0.11224	0.15957	0.02041	0	0.21	0.33673	0.13225	0.14	0.22222	0.15789	0.12179	0.06014	0.2375	0.025	0.26271	0	0.06738	0.09177	0.13636	0.28571	0.02703	0.08235	0.02632	0	0.13333	0.01786	0.08333	0.28571	0.28333	0.45455	0.26	0.23077	0.18354	0.01	0.08163	0.17568	0.31429	0.22727	0.27273
	191	0	0.03061	0	0	0	0	0.41667	0	0	0.03061	0	0.0102	0	0.02	0	0.05797	0.02	0	0	0.0641	0	0	0	0	0	0	0	0	0	0	0	0	0	0	0	0	0.05102	0.00833	0	0	0.03846	0	0	0	0	0	0	0
	193	0.17953	0.13265	0.25	0.08	0.14286	0.15	0.08333	0.02885	0.17073	0.07143	0.09574	0.05102	0	0.01	0.0102	0.03442	0.17	0.06667	0.15789	0.26923	0.14948	0.15	0.225	0.0339	0	0.16667	0.07595	0.56818	0.03571	0.24324	0.13529	0.18421	0	0	0.14286	0.0625	0.11224	0.03333	0.09091	0.09	0.03846	0.20253	0.03	0.26531	0.2973	0.08571	0.04545	0.04545
	195	0.00018	0.0102	0	0.02	0.0119	0	0	0	0.0122	0	0.03191	0	0	0.01	0	0	0.02667	0.03333	0.03947	0.01282	0.00344	0	0	0	0	0.06028	0.07911	0	0	0.01351	0	0	0	0.06667	0	0	0.0102	0	0	0.01	0.07692	0	0.01	0.04082	0.01351	0	0.04545	0
	197	0.00692	0	0.02	0.01	0.10714	0.1	0	0.125	0.0122	0.09184	0.14894	0.12245	0	0	0	0.03261	0.12	0.02222	0.46053	0	0.23368	0	0.25	0.19492	0.25641	0.1773	0.11392	0.25	0	0.05405	0.02941	0.32895	0	0.03333	0	0.10417	0.0102	0	0.05682	0.06	0.07692	0.00633	0.17	0.11224	0.01351	0.05714	0.13636	0.13636
	199	0.00382	0	0	0.01	0.09524	0.05	0	0	0.10976	0.08163	0.07447	0.18367	0	0	0	0.01268	0.05333	0.02222	0	0.00641	0	0	0	0.01695	0	0.06738	0.06962	0	0.03571	0	0	0	0	0.06667	0	0.04167	0.0102	0.04167	0	0.02	0	0	0	0.04082	0	0.08571	0	0.09091
	201	0	0	0	0	0	0	0	0	0	0.02041	0	0	0	0.07	0	0	0	0	0	0	0.00344	0	0	0	0	0	0	0	0	0	0	0	0	0	0	0	0	0	0	0.03	0	0	0	0	0	0	0	0.04545
	205	0.00036	0	0	0	0	0	0	0	0	0	0	0	0	0	0	0	0.03	0	0	0	0	0	0	0	0	0	0.04747	0	0	0	0	0	0	0	0	0	0	0	0	0	0	0	0	0	0	0	0	0
	207	0	0	0	0	0	0	0	0	0	0	0	0.0102	0	0	0	0	0	0	0	0	0	0	0	0	0	0	0	0	0	0	0	0	0	0	0	0	0	0	0	0	0	0	0	0	0	0	0	0
	209	0	0	0	0	0	0	0	0	0	0	0	0	0	0	0	0	0	0	0	0	0	0	0	0	0	0	0	0	0	0	0	0	0	0	0	0	0	0	0	0	0	0	0	0	0	0	0	0
ilsts006	N	2735	48	49	50	40	20	12	52	39	49	47	49	99	50	49	279	150	45	38	78	291	40	20	59	39	138	153	22	14	37	85	38	15	45	27	19	49	60	42	49	26	65	49	49	29	36	11	11
	272	0	0	0	0	0	0	0	0	0	0	0	0	0	0	0	0	0	0	0	0	0	0	0	0	0	0	0	0	0	0	0	0	0	0	0	0	0	0	0	0	0	0	0	0	0	0	0	0
	274	0	0	0	0	0	0	0.70833	0	0.01282	0	0	0	0	0	0	0.00717	0	0	0	0	0	0	0	0	0	0	0	0	0	0	0	0	0	0	0	0	0	0	0	0	0	0	0	0	0	0	0	0
	276	0	0	0	0	0	0	0	0	0	0	0	0	0	0	0	0.01792	0	0	0	0	0	0	0	0	0	0	0	0	0	0	0	0	0	0	0	0	0	0	0	0	0	0	0	0	0	0	0	0
	278	0	0	0	0	0	0	0	0	0	0	0	0	0	0	0	0	0	0	0	0	0	0	0	0	0	0	0	0	0	0	0	0	0	0	0	0	0	0	0	0.0102	0	0	0	0	0	0	0	0
	280	0	0	0	0	0	0	0.29167	0	0.01282	0	0	0	0	0	0	0.00358	0	0	0	0	0	0	0	0	0	0	0	0	0	0	0	0	0	0	0	0	0	0	0	0	0	0	0.07143	0	0	0	0	0
	282	0	0	0	0	0.0125	0	0	0	0	0	0	0	0	0	0	0	0	0	0	0	0	0	0	0	0	0.00362	0	0	0	0	0	0	0	0	0	0	0	0	0.0119	0	0	0.00769	0	0	0	0	0	0
	284	0.00037	0	0	0	0.0375	0	0	0.00962	0.01282	0.03061	0.03191	0	0	0.02	0	0.01434	0.01667	0	0	0.01923	0.04639	0	0	0	0	0	0.00327	0.09091	0	0	0	0	0	0.03333	0	0	0.0102	0	0.0119	0.08163	0.03846	0	0.04082	0.03061	0.01724	0	0	0
	286	0.00037	0.01042	0.03061	0	0.0875	0.025	0	0.01923	0.01282	0.0102	0	0.0102	0	0.01	0	0.00358	0.03333	0.06667	0	0.00641	0.01031	0.025	0	0	0	0	0.00327	0	0.07143	0.01351	0	0.03947	0	0.12222	0	0.02632	0.0102	0	0.03571	0.02041	0	0.06923	0	0.04082	0.01724	0.01389	0.09091	0.04545
	288	0.35521	0.33333	0.02041	0.25	0.2375	0.15	0	0.125	0.14103	0.15306	0.15957	0.14286	0.40909	0.17	0.13265	0.18996	0.19333	0.44444	0.05263	0.19231	0.38144	0.0625	0.075	0.54237	0.30769	0.28986	0.17647	0	0.14286	0.2027	0.55882	0.09211	0.1	0.27778	0.18519	0.26316	0.26531	0.20833	0.08333	0.07143	0.19231	0.06923	0.29592	0.19388	0.51724	0.05556	0.09091	0.04545
	290	0.02176	0.0625	0.09184	0.05	0	0	0	0.01923	0.02564	0.0102	0.11702	0.03061	0.15152	0.03	0.08163	0.02688	0.01333	0.02222	0.13158	0.14103	0.01546	0.0375	0.1	0.0339	0	0	0.00654	0	0	0.02703	0	0.05263	0	0	0	0	0.03061	0	0.02381	0.02041	0.11538	0.17692	0	0	0.01724	0.11111	0.09091	0.04545
	292	0.19397	0.27083	0.34694	0.16	0.1875	0.225	0	0.35577	0.16667	0.21429	0.11702	0.21429	0.20202	0.6	0.36735	0.3172	0.14667	0.05556	0.19737	0.17308	0.1134	0.2625	0.575	0.15254	0.4359	0.33333	0.16993	0.25	0.57143	0.2027	0.15882	0.25	0.73333	0.23333	0.46296	0.42105	0.43878	0.5	0.30952	0.38776	0.30769	0.22308	0.17347	0.11224	0.08621	0.18056	0.36364	0.27273
	293	0	0	0	0	0	0	0	0	0	0	0	0	0	0	0	0	0	0	0	0	0	0	0	0	0	0	0	0	0	0	0	0	0	0	0	0	0	0	0	0	0	0	0	0	0	0	0	0
	294	0.39269	0.1875	0.28571	0.2	0.0375	0.125	0	0.20192	0.38462	0.11224	0.08511	0.12245	0.04545	0.12	0.18367	0.32437	0.17333	0.33333	0.28947	0.07692	0.00687	0.4125	0.125	0.0678	0	0.25725	0.16993	0.31818	0.14286	0.36486	0	0.46053	0	0.05556	0.16667	0.18421	0.0102	0.09167	0.08333	0.15306	0.15385	0.11538	0.12245	0.41837	0.12069	0.33333	0.04545	0.22727
	296	0.0298	0.11458	0.09184	0.31	0.3625	0.45	0	0.21154	0.19231	0.38776	0.43617	0.39796	0.13636	0.04	0.20408	0.07885	0.41	0.05556	0.01316	0.1859	0.18385	0.1875	0.125	0.18644	0.25641	0.0471	0.46405	0.25	0.03571	0.02703	0.08824	0.07895	0	0.27778	0.11111	0.10526	0.06122	0.19167	0.38095	0.20408	0.13462	0.16154	0.28571	0.17347	0.15517	0.30556	0.31818	0.31818
	298	0.00073	0	0	0.02	0	0.025	0	0.03846	0.01282	0.02041	0	0.02041	0.05556	0.01	0.03061	0.00717	0.00667	0	0.31579	0.02564	0.24055	0	0	0.01695	0	0.02536	0.00327	0.02273	0	0.16216	0	0.02632	0	0	0.03704	0	0.05102	0.00833	0	0.0102	0	0.1	0	0	0	0	0	0.04545
	300	0.00512	0.02083	0.13265	0.01	0	0	0	0.01923	0.02564	0	0.01064	0.02041	0	0	0	0.00717	0.00667	0.02222	0	0.17949	0.00172	0.0125	0	0	0	0.04348	0.00327	0.06818	0.03571	0	0.19412	0	0.16667	0	0.03704	0	0.08163	0	0.05952	0.0102	0.05769	0.01538	0.0102	0.03061	0.06897	0	0	0
	301	0	0	0	0	0	0	0	0	0	0	0	0	0	0	0	0	0	0	0	0	0	0	0	0	0	0	0	0	0	0	0	0	0	0	0	0	0	0	0	0	0	0	0	0	0	0	0	0
	302	0	0	0	0	0.0375	0	0	0	0	0.04082	0.02128	0.04082	0	0	0	0.00179	0	0	0	0	0	0	0	0	0	0	0	0	0	0	0	0	0	0	0	0	0.04082	0	0	0.02041	0	0.05385	0	0	0	0	0	0
	304	0	0	0	0	0	0	0	0	0	0	0	0	0	0	0	0	0	0	0	0	0	0	0	0	0	0	0	0	0	0	0	0	0	0	0	0	0	0	0	0	0	0.00769	0	0	0	0	0	0
	306	0	0	0	0	0	0	0	0	0	0.02041	0.02128	0	0	0	0	0	0	0	0	0	0	0	0	0	0	0	0	0	0	0	0	0	0	0	0	0	0	0	0	0	0	0	0	0	0	0	0	0
	308	0	0	0	0	0	0	0	0	0	0	0	0	0	0	0	0	0	0	0	0	0	0	0	0	0	0	0	0	0	0	0	0	0	0	0	0	0	0	0	0.0102	0	0	0	0	0	0	0	0
Tgla227	N	2746	39	50	50	44	20	12	52	41	49	47	49	99	50	49	279	150	45	38	78	291	40	20	59	39	142	158	22	14	37	85	38	15	45	30	23	49	60	45	49	26	80	50	49	36	38	13	12
	67	0	0	0	0	0	0	0	0	0	0	0	0	0	0	0	0	0	0	0	0	0	0	0	0	0	0	0	0	0	0	0	0	0	0	0	0	0	0	0	0	0	0	0	0	0	0	0	0
	69	0	0	0	0	0	0	0.70833	0	0	0	0	0	0	0	0	0.00896	0	0	0	0	0	0	0	0	0	0	0	0	0	0	0	0	0	0	0	0	0	0	0	0	0	0	0	0	0	0	0	0
	71	0	0	0	0	0	0	0.29167	0	0	0	0	0	0	0	0	0.00538	0	0	0	0	0	0	0	0	0	0	0	0	0	0	0	0	0	0	0	0	0	0	0	0	0	0	0	0	0	0	0	0
	73	0	0	0	0	0	0	0	0	0	0	0	0	0	0	0	0	0	0	0	0	0	0	0	0	0	0	0	0	0	0	0	0	0	0	0	0	0	0	0	0.0102	0	0	0	0	0	0	0	0
	75	0	0	0	0	0	0	0	0	0	0	0	0	0	0	0	0	0	0	0	0	0	0	0	0	0	0	0	0	0	0	0	0	0	0	0	0	0	0	0	0	0	0	0	0	0	0	0	0
	77	0.00146	0	0.03	0	0.05682	0	0	0	0.04878	0.08163	0.10638	0.05102	0.21717	0.07	0.11224	0.08423	0.07333	0	0.02632	0.02564	0.00515	0.025	0	0.04237	0	0	0.05063	0	0	0.2027	0	0	0	0	0	0	0.0102	0	0.14444	0.0102	0.05769	0.21875	0	0	0	0.10526	0.15385	0.04167
	79	0.00018	0	0	0.01	0.07955	0	0	0.06731	0.03659	0.06122	0	0.04082	0	0.03	0.12245	0.00717	0.00333	0.01111	0.13158	0.03846	0	0.0125	0	0.08475	0	0.00352	0.00949	0	0.03571	0.08108	0	0	0	0.11111	0.06667	0.30435	0.16327	0.01667	0.03333	0.07143	0.07692	0.025	0	0.02041	0.01389	0.06579	0	0.04167
	81	0.14075	0.20513	0.05	0.16	0.11364	0.175	0	0.30769	0.08537	0.16327	0.23404	0.2551	0.33838	0.18	0.17347	0.20072	0.26667	0.18889	0.23684	0.16026	0.21478	0.125	0.1	0.12712	0.07692	0.04225	0.32595	0.5	0.35714	0.25676	0.2	0.15789	0.5	0.21111	0.08333	0.02174	0.04082	0.29167	0.18889	0.2449	0.11538	0.09375	0.03	0.03061	0	0.05263	0.34615	0.08333
	83	0.09432	0.07692	0.02	0.14	0.28409	0.05	0	0.05769	0.09756	0.05102	0.07447	0.10204	0.17677	0.04	0.19388	0.0681	0.04667	0.15556	0.05263	0.10256	0	0.175	0.1	0.14407	0.21795	0.04577	0.07911	0.06818	0	0.02703	0	0.10526	0	0.1	0.01667	0	0.05102	0.00833	0.04444	0.06122	0.01923	0.1375	0.27	0.0102	0.125	0.31579	0.19231	0.375
	85	0.00018	0	0	0	0	0	0	0	0	0	0	0	0	0	0.02041	0	0	0	0	0.01282	0	0	0	0	0	0.00352	0.13608	0	0	0	0	0	0	0	0	0.04348	0	0	0	0.02041	0	0	0.04	0.02041	0.18056	0.01316	0	0
	87	0.08066	0.10256	0.16	0.01	0.06818	0.075	0	0.03846	0.02439	0.07143	0.20213	0.02041	0.09596	0.03	0.09184	0.1362	0.04	0.03333	0.02632	0.04487	0.07388	0.1125	0.1	0	0.5	0.0493	0.03481	0.02273	0.03571	0	0	0.05263	0	0.11111	0.26667	0.26087	0.02041	0.09167	0.08889	0.09184	0.03846	0.03125	0	0.03061	0	0.01316	0.11538	0
	89	0.12127	0.14103	0.37	0.34	0.13636	0.175	0	0.11538	0.19512	0.16327	0.11702	0.12245	0.0101	0	0.04082	0.07168	0.13667	0.32222	0.23684	0.34615	0.12543	0.25	0	0.18644	0	0.28521	0.1519	0.15909	0	0.28378	0.39412	0.42105	0.1	0.02222	0.03333	0.15217	0.27551	0.03333	0.22222	0.10204	0.11538	0.16875	0	0.22449	0.125	0.11842	0.07692	0.16667
	91	0.15513	0.12821	0.07	0.09	0.04545	0.15	0	0.04808	0.18293	0.19388	0.06383	0.15306	0	0.22	0.12245	0.11649	0.15333	0.22222	0.10526	0.10897	0.14089	0.125	0.425	0.02542	0.02564	0.33451	0.13608	0.15909	0.28571	0.09459	0.07059	0.14474	0.06667	0.08889	0.25	0.06522	0.06122	0.15833	0.02222	0.13265	0.17308	0.0125	0.23	0.2449	0.15278	0.07895	0	0
	93	0.03569	0.07692	0.04	0.04	0.11364	0.025	0	0.11538	0.07317	0.04082	0.08511	0.04082	0.00505	0.25	0.09184	0.13441	0.03333	0.01111	0	0.02564	0.37629	0	0	0.00847	0.10256	0.1831	0	0	0.25	0.01351	0.19412	0.01316	0.06667	0	0.28333	0.15217	0.19388	0.23333	0.13333	0.17347	0.21154	0.04375	0.18	0.15306	0.13889	0.15789	0.03846	0.125
	95	0.00146	0.01282	0.01	0	0.02273	0.275	0	0.03846	0.0122	0.02041	0.02128	0.05102	0	0	0	0.02151	0.00333	0	0	0	0.04811	0	0	0.22881	0	0	0.00316	0.06818	0	0	0.14118	0.01316	0	0.05556	0	0	0.05102	0	0	0.02041	0	0	0.12	0.11224	0.08333	0	0	0.04167
	97	0.23543	0.17949	0.14	0.06	0.03409	0.075	0	0.19231	0.18293	0.11224	0.06383	0.09184	0.15657	0.18	0.03061	0.14516	0.24333	0.04444	0.18421	0.13462	0.01546	0.175	0.275	0.15254	0.07692	0.05282	0.07278	0.02273	0.03571	0.04054	0	0.09211	0.06667	0.3	0	0	0.13265	0.16667	0.12222	0.05102	0.19231	0.26875	0	0.04082	0.01389	0.07895	0.07692	0.125
	99	0.00965	0.02564	0	0.13	0.04545	0	0	0.01923	0.02439	0.04082	0.02128	0.06122	0	0	0	0	0	0	0	0	0	0	0	0	0	0	0	0	0	0	0	0	0	0	0	0	0	0	0	0.0102	0	0	0.13	0.0102	0.16667	0	0	0
	101	0.00073	0.03846	0.11	0	0	0	0	0	0.03659	0	0.01064	0.0102	0	0	0	0	0	0	0	0	0	0	0	0	0	0	0	0	0	0	0	0	0	0	0	0	0	0	0	0	0	0	0	0	0	0	0	0
	103	0.12309	0.01282	0	0.02	0	0	0	0	0	0	0	0	0	0	0	0	0	0.01111	0	0	0	0	0	0	0	0	0	0	0	0	0	0	0.2	0	0	0	0	0	0	0	0	0	0	0.10204	0	0	0	0
	121	0	0	0	0	0	0	0	0	0	0	0	0	0	0	0	0	0	0	0	0	0	0	0	0	0	0	0	0	0	0	0	0	0	0	0	0	0	0	0	0	0	0	0	0	0	0	0	0
	123	0	0	0	0	0	0	0	0	0	0	0	0	0	0	0	0	0	0	0	0	0	0	0	0	0	0	0	0	0	0	0	0	0	0	0	0	0	0	0	0	0	0	0	0	0	0	0	0
	125	0	0	0	0	0	0	0	0	0	0	0	0	0	0	0	0	0	0	0	0	0	0	0	0	0	0	0	0	0	0	0	0	0	0	0	0	0	0	0	0	0	0	0	0	0	0	0	0
Tgla122	N	2746	49	50	50	44	20	12	52	41	49	47	49	99	50	49	279	150	45	38	78	291	40	20	59	39	142	157	22	14	37	85	38	15	45	30	24	49	60	45	50	25	80	50	49	37	38	13	12
	135	0	0	0	0	0	0	0	0	0	0	0	0	0	0	0	0	0	0	0	0	0	0	0	0	0	0	0	0	0	0	0	0	0	0	0	0	0	0	0	0	0	0	0	0	0	0	0	0
	137	0	0	0	0	0	0	0	0	0	0	0	0	0	0	0	0.00179	0	0	0	0	0	0	0	0	0	0.00704	0	0	0	0	0	0	0	0	0.01667	0	0	0.00833	0.01111	0.02	0	0	0	0	0.06757	0	0	0
	139	0.00291	0	0.03	0	0	0	0	0.02885	0	0.0102	0.01064	0.0102	0	0	0	0	0	0	0.01316	0	0	0.0125	0	0	0	0	0	0	0	0	0	0.01316	0	0	0	0	0	0	0.01111	0	0	0	0	0	0	0.01316	0	0
	141	0.01384	0.11224	0.03	0.18	0.05682	0.025	0	0.05769	0	0.09184	0.07447	0.10204	0.06566	0.02	0.12245	0.17742	0	0	0	0.01923	0.05842	0.1875	0.025	0.05085	0.17949	0.12324	0.01592	0.11364	0	0	0.13529	0.03947	0	0	0	0.02083	0	0.05833	0.06667	0.05	0.02	0.0625	0.06	0.0102	0	0.15789	0	0.04167
	143	0.31282	0.21429	0.56	0.29	0.46591	0.5	0.20833	0.39423	0.54878	0.27551	0.3617	0.2449	0.08081	0.12	0.02041	0.17563	0.24333	0.47778	0.44737	0.37179	0.75601	0.225	0.55	0.21186	0.16667	0.51408	0.17834	0.25	0.25	0.31081	0.22353	0.35526	0.36667	0.3	0.28333	0.35417	0.5	0.14167	0.34444	0.49	0.44	0.225	0.16	0.63265	0.33784	0.13158	0.30769	0.25
	145	0.00018	0.02041	0	0	0.03409	0	0.16667	0.00962	0	0.02041	0	0.03061	0	0	0.08163	0.00179	0	0	0	0	0	0	0	0	0	0	0	0	0	0	0	0	0.03333	0	0	0	0	0.01667	0.01111	0.02	0	0	0	0.0102	0	0.01316	0	0
	147	0.00036	0	0	0.01	0.09091	0.05	0	0.01923	0	0.0102	0.01064	0.0102	0	0	0.0102	0.01075	0.08333	0	0	0.03205	0.01031	0	0	0.00847	0.03846	0.05634	0.16561	0.02273	0	0	0.06471	0.09211	0	0.01111	0	0	0.03061	0.01667	0.06667	0	0.04	0.0625	0.04	0	0.02703	0.03947	0	0.04167
	149	0.21941	0.10204	0	0.04	0	0	0	0.05769	0.02439	0.02041	0	0.06122	0	0.1	0.04082	0.01971	0.14667	0.05556	0	0.08974	0.01203	0	0	0.01695	0	0.01408	0.03185	0	0.07143	0	0.01765	0.01316	0.03333	0	0.03333	0.1875	0	0	0.02222	0	0	0.01875	0.15	0	0.01351	0.02632	0.03846	0
	151	0.07374	0.18367	0.3	0.28	0.21591	0.225	0.25	0.18269	0.17073	0.2449	0.2766	0.23469	0.4697	0.11	0.45918	0.27599	0.16333	0.13333	0.19737	0.29487	0.09966	0.1125	0.35	0.64407	0.10256	0.08099	0.28662	0.29545	0.64286	0.13514	0.55882	0.18421	0.16667	0.47778	0.41667	0.16667	0.12245	0.45	0.14444	0.26	0.2	0.2	0.41	0.14286	0.39189	0.26316	0.30769	0.25
	153	0.01001	0.11224	0.03	0.12	0.03409	0.025	0.29167	0.07692	0.06098	0.14286	0.11702	0.11224	0	0.08	0.06122	0.05914	0.22	0.01111	0.06579	0.05128	0	0	0	0.00847	0.29487	0	0.1879	0	0	0.25676	0	0.05263	0.4	0.17778	0.05	0.0625	0.07143	0.2	0.13333	0.05	0.02	0.28125	0.1	0.0102	0.08108	0.23684	0.23077	0.20833
	155	0	0	0	0	0.06818	0.025	0	0.00962	0	0.0102	0	0	0	0	0	0	0.03333	0	0	0.02564	0.00172	0	0	0	0	0	0	0	0	0	0	0	0	0	0	0	0.0102	0	0.01111	0	0.04	0.0375	0	0.15306	0	0	0	0
	157	0	0	0	0	0	0	0	0	0	0	0	0	0	0.03	0	0.00179	0	0	0	0.05128	0.00344	0	0	0	0	0	0	0	0	0	0	0	0	0	0	0	0	0	0	0.01	0.02	0	0	0	0	0	0	0
	159	0.00546	0	0	0	0	0.025	0.08333	0	0.0122	0.02041	0	0	0	0.1	0	0.00358	0.00667	0	0	0	0	0	0	0	0	0	0.00318	0	0	0	0	0	0	0	0	0.10417	0	0	0.02222	0	0	0	0	0	0	0	0	0.04167
	161	0.06264	0.06122	0	0.02	0.03409	0.025	0	0.13462	0.04878	0.08163	0.05319	0.09184	0.23737	0.33	0.20408	0.16487	0.09333	0.05556	0.01316	0.03846	0.03093	0.0125	0.025	0.01695	0	0.1338	0.04459	0.04545	0	0.06757	0	0.02632	0	0	0.03333	0.04167	0.2551	0.025	0.1	0.04	0.06	0.05	0.03	0.04082	0.08108	0.09211	0.07692	0.16667
	163	0.16333	0.0102	0	0.01	0	0	0	0	0.02439	0	0	0	0	0	0	0	0	0	0.01316	0	0	0.3375	0	0	0	0	0	0.11364	0	0.01351	0	0.17105	0	0	0	0	0	0	0.01111	0	0.06	0	0	0	0	0	0	0
	165	0	0	0	0	0	0	0	0	0.0122	0	0	0	0	0	0	0.00179	0	0	0	0	0	0	0	0.01695	0	0	0	0	0	0	0	0	0	0	0	0	0	0	0	0.03	0.04	0	0	0	0	0	0	0
	167	0.00018	0	0	0.01	0	0	0	0	0.0122	0	0	0.0102	0	0	0	0	0	0	0	0	0	0.025	0	0	0	0	0	0	0	0	0	0	0	0	0	0	0	0	0	0.01	0	0	0.04	0	0	0	0	0
	169	0.00018	0	0	0.03	0	0	0	0.00962	0.0122	0.03061	0.04255	0.02041	0	0.09	0	0	0	0	0	0	0.00172	0	0	0.00847	0.21795	0.01408	0	0	0	0	0	0	0	0	0.1	0	0	0.08333	0.03333	0.01	0	0	0	0	0	0	0.03846	0
	171	0.0539	0	0	0	0	0	0	0	0.02439	0	0	0	0	0	0	0.01971	0	0.22222	0.25	0	0	0.0125	0.05	0.01695	0	0	0	0.15909	0	0.17568	0	0.03947	0	0	0	0.04167	0	0	0	0.01	0	0	0	0	0	0	0	0
	173	0.00819	0.09184	0.03	0	0	0	0	0	0	0	0	0	0	0	0	0.07885	0	0	0	0	0	0	0	0	0	0	0.01274	0	0	0.02703	0	0.01316	0	0	0	0	0	0	0	0	0.02	0	0.01	0	0	0	0	0
	175	0	0.02041	0.02	0	0	0.075	0	0.01923	0	0	0	0	0.08586	0	0	0	0.01	0	0	0.00641	0.01375	0	0	0	0	0	0	0	0.03571	0	0	0	0	0	0.05	0.02083	0	0	0	0	0	0.0625	0	0	0	0.02632	0	0
	177	0.00036	0.03061	0	0.01	0	0.025	0	0	0	0	0.05319	0.0102	0.06061	0	0	0.00538	0	0	0	0	0.00515	0	0	0	0	0	0.01274	0	0	0	0	0	0	0	0	0	0	0	0	0	0	0	0	0	0	0	0	0
	179	0	0	0	0	0	0	0	0	0	0.04082	0	0.06122	0	0	0	0	0	0.04444	0	0.01923	0	0	0	0	0	0	0.06051	0	0	0.01351	0	0	0	0	0	0	0	0	0	0	0	0	0	0	0	0	0	0
	181	0.00401	0	0	0	0	0	0	0	0.0122	0	0	0	0	0	0	0	0	0	0	0	0.00515	0.0625	0	0	0	0	0	0	0	0	0	0	0	0.03333	0.01667	0	0	0	0.01111	0	0.02	0	0	0	0	0	0	0
	183	0.06846	0	0	0	0	0	0	0	0.03659	0	0	0	0	0.02	0	0.00179	0	0	0	0	0.00172	0.0125	0	0	0	0.05634	0	0	0	0	0	0	0	0	0	0	0.0102	0	0	0	0.02	0	0	0	0	0	0	0
	185	0	0.04082	0	0	0	0	0	0	0	0	0	0	0	0	0	0	0	0	0	0	0	0	0	0	0	0	0	0	0	0	0	0	0	0	0	0	0	0	0	0	0	0	0	0	0	0	0	0
Sps115	N	2746	49	50	50	40	20	12	52	41	49	47	49	99	50	49	279	150	45	38	78	291	40	20	59	39	142	158	22	14	37	85	38	15	45	28	22	47	60	44	50	24	80	50	49	31	37	13	11
	230	0	0	0	0	0	0	0	0	0	0	0	0	0	0	0	0	0	0	0	0	0	0	0	0	0	0	0	0	0	0	0	0	0	0	0	0	0	0	0	0	0	0	0	0	0	0	0	0
	232	0	0	0	0	0	0	0	0	0	0	0	0	0	0	0	0	0	0	0	0	0	0	0	0	0	0	0	0	0	0	0	0	0	0	0	0	0	0	0	0	0	0	0	0	0	0	0	0
	236	0	0	0	0	0	0	0	0	0	0	0	0	0	0	0	0	0	0	0	0	0	0	0	0	0	0	0	0	0	0	0	0	0	0	0	0	0	0	0	0	0	0	0	0	0	0	0	0
	238	0	0	0	0	0	0	0	0	0	0	0	0	0	0	0	0.00179	0	0	0	0	0	0	0	0	0	0	0	0	0	0	0	0	0	0	0	0	0	0	0	0	0	0	0	0	0	0	0	0
	240	0	0	0	0	0	0	0	0	0	0	0	0	0	0	0	0	0	0	0	0	0	0	0	0	0	0	0	0	0	0	0	0	0	0	0	0	0	0	0	0	0	0	0	0	0.01613	0	0	0
	242	0	0	0	0	0	0	0	0	0	0	0	0	0	0	0	0	0	0	0	0	0	0	0	0	0	0	0	0	0	0	0	0	0	0	0	0	0	0	0	0	0	0	0	0	0	0	0	0
	244	0	0	0	0	0	0	0	0	0.0122	0	0	0	0	0	0	0.00538	0	0	0	0	0	0	0	0	0	0	0	0	0	0	0	0	0	0	0	0	0	0	0	0	0	0	0.03	0	0	0	0	0
	246	0	0.02041	0	0	0	0	0.41667	0.00962	0.0122	0	0	0	0	0	0	0.00896	0	0	0	0	0	0	0	0	0	0	0	0	0	0	0	0	0	0	0	0	0	0	0	0.04	0.0625	0	0	0	0.19355	0.06757	0.11538	0.04545
	248	0.53787	0.57143	0.3	0.75	0.5375	0.625	0.20833	0.52885	0.52439	0.60204	0.61702	0.5	0.13636	0.45	0.54082	0.37634	0.64667	0.83333	0.56579	0.61538	0.39863	0.775	0.875	0.30508	0.85897	0.32394	0.43354	0.95455	0.71429	0.62162	0.02941	0.65789	0.2	0.51111	0.73214	0.38636	0.54255	0.46667	0.60227	0.41	0.54167	0.4625	0.52	0.39796	0.5	0.40541	0.26923	0.5
	250	0.00018	0	0	0	0	0	0.375	0	0	0	0.01064	0.02041	0	0	0	0.00179	0	0	0	0	0	0	0	0	0	0	0	0	0.03571	0	0	0	0.13333	0	0.07143	0	0.01064	0.08333	0.09091	0.04	0.0625	0.025	0	0	0.06452	0.02703	0.03846	0
	252	0.26712	0.08163	0.24	0.05	0.15	0.125	0	0.10577	0.18293	0.15306	0.08511	0.14286	0.00505	0.01	0.04082	0.08423	0.07333	0.13333	0.19737	0.12821	0.14089	0.0125	0.025	0.15254	0	0.16197	0.08544	0.04545	0.07143	0.22973	0.33529	0.10526	0	0	0.03571	0.20455	0.10638	0.04167	0.06818	0.17	0.08333	0.175	0.02	0.10204	0.03226	0.17568	0.15385	0.09091
	254	0.0386	0.14286	0.09	0.07	0.15	0.025	0	0.07692	0.04878	0.04082	0.10638	0.13265	0	0.16	0.07143	0.1129	0.00667	0.01111	0	0.10256	0.07732	0.0875	0.05	0.36441	0.14103	0.05634	0.10759	0	0	0	0.15882	0.02632	0.13333	0.16667	0.08929	0.25	0.09574	0.075	0.10227	0.2	0.10417	0.125	0.04	0.16327	0.12903	0.06757	0.11538	0.04545
	256	0.12254	0.10204	0.31	0.02	0.125	0.125	0	0.08654	0.07317	0.14286	0.10638	0.15306	0.82828	0.35	0.20408	0.30645	0.06667	0.02222	0.23684	0.14103	0.09622	0.1	0.05	0.08475	0	0.16197	0.0981	0	0	0.14865	0.47647	0.17105	0.36667	0.2	0	0.13636	0.06383	0.00833	0.01136	0.08	0.04167	0.04375	0.29	0.16327	0.06452	0.12162	0.15385	0.09091
	258	0.01584	0.02041	0	0.01	0.0375	0.025	0	0	0	0.02041	0	0.0102	0	0	0.03061	0.00896	0.00333	0	0	0	0	0	0	0	0	0.01761	0.00316	0	0	0	0	0	0	0	0	0	0.01064	0.23333	0	0	0	0	0	0	0	0	0.03846	0.04545
	260	0.01766	0.06122	0.06	0.1	0	0.075	0	0.18269	0.08537	0.03061	0.06383	0.03061	0.02525	0.03	0.11224	0.09319	0.17667	0	0	0.00641	0.15979	0.025	0	0.0678	0	0.27817	0.26899	0	0.17857	0	0	0.03947	0.16667	0.1	0.07143	0	0.17021	0.09167	0.125	0.06	0.10417	0.16875	0.1	0.17347	0	0.12162	0.07692	0.13636
	261	0.00018	0	0	0	0	0	0	0	0.04878	0.0102	0	0.0102	0	0	0	0	0.00667	0	0	0	0.11684	0	0	0.02542	0	0	0.00316	0	0	0	0	0	0	0.02222	0	0	0	0	0	0	0	0	0	0	0	0	0	0
	262	0	0	0	0	0	0	0	0.00962	0.0122	0	0.01064	0	0.00505	0	0	0	0.02	0	0	0.00641	0.01031	0	0	0	0	0	0	0	0	0	0	0	0	0	0	0.02273	0	0	0	0	0	0	0	0	0	0.01351	0.03846	0.04545
	264	0	0	0	0	0	0	0	0	0	0	0	0	0	0	0	0	0	0	0	0	0	0	0	0	0	0	0	0	0	0	0	0	0	0	0	0	0	0	0	0	0	0	0	0	0	0	0	0
Eth225	N	2746	49	50	50	44	20	12	52	41	49	47	49	99	50	49	279	150	45	38	78	291	40	20	59	39	142	158	22	14	37	85	38	15	45	30	23	49	60	45	50	26	80	50	49	37	38	14	12
	132	0	0	0	0	0	0	0	0	0	0	0	0	0	0	0	0	0	0	0	0	0	0	0	0	0	0	0	0	0	0	0	0	0	0	0	0	0	0	0	0	0	0	0	0	0	0	0	0
	138	0	0	0	0	0	0	0	0	0	0	0	0	0	0	0	0	0	0	0	0	0	0	0	0	0	0	0	0	0	0	0	0	0	0	0	0	0	0	0	0	0	0	0	0	0	0	0	0
	140	0.1728	0.06122	0.11	0.09	0.21591	0.25	0	0.19231	0.04878	0.12245	0.14894	0.08163	0	0	0.15306	0.05018	0.17333	0.26667	0.13158	0.16667	0.01031	0.125	0.625	0.38983	0.02564	0.16549	0.37342	0.09091	0.42857	0.21622	0.4	0.22368	0	0.14444	0.28333	0.21739	0.44898	0.08333	0.23333	0.31	0.48077	0.35	0.16	0.07143	0.21622	0.23684	0.14286	0.20833
	142	0.00583	0.04082	0	0.02	0	0	0	0.04808	0.03659	0.04082	0	0	0	0.17	0	0.00179	0	0	0	0	0	0.0125	0.075	0	0	0	0	0	0	0	0	0.03947	0	0	0	0	0	0	0	0	0.03846	0.00625	0	0	0	0.01316	0.03571	0
	144	0.03205	0.20408	0.03	0.29	0.10227	0.025	0	0.21154	0.19512	0.18367	0.07447	0.18367	0.5	0.51	0.37755	0.31362	0.15333	0.1	0.07895	0.02564	0.13746	0.0125	0	0.19492	0.47436	0.09507	0.08228	0	0.10714	0.05405	0	0.05263	0.03333	0.11111	0.05	0.06522	0.11224	0.20833	0.12222	0.2	0.11538	0.19375	0.12	0.2551	0.10811	0.17105	0.35714	0.08333
	146	0.01384	0	0.01	0.1	0.09091	0.075	0.125	0.06731	0.02439	0.06122	0.09574	0.05102	0	0	0.06122	0.07527	0.08333	0.02222	0.03947	0.00641	0.23024	0.0125	0	0.08475	0.38462	0.12676	0.03797	0.11364	0.14286	0.06757	0.19412	0.14474	0.13333	0.04444	0.01667	0	0.02041	0.19167	0.04444	0.03	0	0.04375	0.06	0.15306	0	0.01316	0	0.08333
	148	0.36981	0.33673	0.4	0.15	0.22727	0.225	0.41667	0.13462	0.29268	0.11224	0.24468	0.26531	0.11616	0.01	0.22449	0.10036	0.26667	0.28889	0.05263	0.32692	0.27663	0.2125	0.225	0.18644	0.03846	0.36972	0.15823	0.5	0.10714	0.09459	0.08235	0.15789	0.56667	0.13333	0.43333	0.15217	0.08163	0.025	0.27778	0.15	0.11538	0.11875	0.12	0.28571	0.35135	0.09211	0.10714	0.20833
	150	0.3354	0.26531	0.45	0.27	0.29545	0.425	0	0.28846	0.32927	0.40816	0.42553	0.32653	0.18687	0.31	0.16327	0.37097	0.32333	0.3	0.69737	0.47436	0.34192	0.5	0.075	0.09322	0.07692	0.22535	0.34177	0.29545	0.21429	0.56757	0.1	0.38158	0.26667	0.56667	0.16667	0.56522	0.23469	0.49167	0.3	0.27	0.17308	0.19375	0.39	0.19388	0.28378	0.34211	0.32143	0.20833
	152	0.07028	0	0	0.04	0.03409	0	0	0.00962	0.06098	0.04082	0	0.0102	0	0	0	0	0	0.02222	0	0	0.00344	0.125	0	0.05085	0	0.01761	0.00633	0	0	0	0.22353	0	0	0	0	0	0	0	0.01111	0	0	0	0.09	0	0	0	0	0
	154	0	0.09184	0	0.04	0	0	0	0.04808	0.0122	0	0	0.02041	0.14646	0	0.02041	0.03226	0	0	0	0	0	0	0	0	0	0	0	0	0	0	0	0	0	0	0.05	0	0	0	0.01111	0.04	0	0	0	0	0.01351	0.01316	0	0
	156	0	0	0	0	0.02273	0	0.45833	0	0	0	0	0	0	0	0	0.02151	0	0	0	0	0	0	0	0	0	0	0	0	0	0	0	0	0	0	0	0	0.10204	0	0	0	0.07692	0	0	0	0	0	0	0
	158	0	0	0	0	0	0	0	0	0	0.03061	0.01064	0.06122	0.05051	0	0	0.00179	0	0	0	0	0	0	0	0	0	0	0	0	0	0	0	0	0	0	0	0	0	0	0	0	0	0.08125	0.04	0.04082	0.01351	0.10526	0.03571	0.20833
	160	0	0	0	0	0.01136	0	0	0	0	0	0	0	0	0	0	0.03226	0	0	0	0	0	0	0	0	0	0	0	0	0	0	0	0	0	0	0	0	0	0	0	0	0	0.0125	0.02	0	0.01351	0.01316	0	0
	162	0	0	0	0	0	0	0	0	0	0	0	0	0	0	0	0	0	0	0	0	0	0	0	0	0	0	0	0	0	0	0	0	0	0	0	0	0	0	0	0	0	0	0	0	0	0	0	0
Tgla53	N	2745	49	50	50	41	20	12	52	40	49	47	48	98	50	49	278	150	45	38	78	291	40	20	59	39	142	158	22	14	37	85	38	15	45	19	17	49	60	39	50	23	77	50	49	36	38	12	5
	150	0	0	0	0	0	0	0	0	0	0	0	0	0	0	0	0	0	0	0	0	0	0	0	0	0	0	0	0	0	0	0	0	0	0	0	0	0	0	0	0	0	0	0	0	0	0	0	0
	152	0	0	0	0	0	0	0	0	0	0	0.01064	0	0	0	0	0.0036	0	0	0	0	0	0	0	0	0	0	0	0	0	0	0	0	0	0	0	0	0	0	0	0	0	0	0	0	0	0	0	0
	154	0.02532	0.04082	0.05	0.21	0.02439	0	0.08333	0.02885	0.0375	0.12245	0.14894	0.07292	0	0.06	0.06122	0.05935	0.08	0.01111	0	0.12821	0.01203	0.0875	0.025	0.04237	0	0.08451	0.05696	0.09091	0.53571	0.01351	0.03529	0.06579	0.03333	0.11111	0.68421	0.23529	0.05102	0.28333	0.17949	0.02	0.02174	0.04545	0.05	0.14286	0.01389	0.06579	0.16667	0.1
	156	0	0	0.06	0	0	0.025	0.125	0	0	0	0	0	0	0	0.0102	0.0018	0	0	0	0	0	0	0	0	0	0	0	0	0	0	0	0	0	0.01111	0	0	0	0	0	0	0.02174	0	0	0	0	0	0	0
	158	0.06466	0.11224	0.02	0.21	0	0	0.33333	0	0.0625	0.0102	0.01064	0	0.03571	0	0.03061	0.00719	0	0.06667	0.01316	0.10897	0.06014	0.0375	0	0.0339	0	0	0	0.29545	0	0	0	0.05263	0	0	0	0	0	0	0	0.01	0	0.00649	0.11	0	0	0.01316	0	0
	160	0.1459	0.2449	0.15	0.24	0.09756	0.05	0	0.21154	0.1125	0.07143	0.10638	0.11458	0.54592	0.32	0.28571	0.13309	0.14333	0.06667	0.27632	0.19231	0.32131	0.1625	0.7	0.44915	0.30769	0.24296	0.21519	0.11364	0.03571	0.18919	0.49412	0.11842	0.2	0.07778	0.21053	0.64706	0.30612	0.14167	0.34615	0.25	0.08696	0.11688	0.27	0.2551	0.125	0.11842	0.08333	0
	162	0.18434	0.17347	0.16	0.04	0.34146	0.2	0	0.17308	0.2875	0.12245	0.12766	0.15625	0.13776	0.04	0.11224	0.03957	0.06	0.27778	0.02632	0.0641	0.12199	0.125	0.175	0.21186	0.07692	0.34507	0.02532	0.11364	0	0.27027	0.35882	0.18421	0.1	0.15556	0	0	0.04082	0.05833	0.03846	0.03	0.36957	0.06494	0.05	0.05102	0.16667	0.17105	0.04167	0.1
	164	0.00237	0.02041	0.15	0.02	0.15854	0.2	0	0.07692	0.075	0.11224	0.15957	0.05208	0	0	0.02041	0.08813	0.06333	0.02222	0.11842	0.07692	0	0.0625	0.025	0.14407	0	0.04577	0.15506	0.04545	0.03571	0.08108	0.00588	0.07895	0	0.02222	0.07895	0.02941	0.04082	0	0.07692	0.01	0	0.05195	0	0	0.01389	0.02632	0.04167	0
	166	0.07031	0.0102	0.09	0.07	0.0122	0.05	0.25	0.00962	0.075	0.03061	0.01064	0.04167	0.0102	0	0.02041	0.01079	0.04333	0.15556	0.22368	0.09615	0.02062	0.1125	0	0.02542	0.02564	0	0.1962	0.27273	0.03571	0.10811	0	0.09211	0	0.03333	0	0.02941	0.04082	0.01667	0.07692	0	0.02174	0.04545	0.01	0.05102	0.04167	0.06579	0.04167	0
	168	0.1439	0.11224	0.16	0.14	0.08537	0	0.08333	0.08654	0.025	0.16327	0.29787	0.16667	0	0.2	0.14286	0.05935	0.27667	0.04444	0.02632	0.10256	0.0945	0.05	0.05	0	0.23077	0	0.11076	0.02273	0.03571	0	0	0.14474	0.46667	0.23333	0	0	0.20408	0.30833	0.20513	0.09	0.1087	0.2987	0.34	0.06122	0.05556	0.15789	0.29167	0.4
	170	0.03534	0.08163	0.02	0.01	0.09756	0.2	0.125	0.10577	0.125	0.16327	0.04255	0.15625	0.04592	0	0.08163	0.10971	0.18667	0.07778	0.13158	0.13462	0.311	0.175	0	0.04237	0.01282	0.04225	0.02848	0	0.25	0.08108	0.10588	0.06579	0.16667	0.18889	0	0.05882	0.26531	0.00833	0.02564	0.11	0.06522	0.14935	0.07	0.18367	0.16667	0.09211	0.08333	0
	172	0.0377	0.02041	0	0.01	0.0122	0.25	0	0.10577	0.15	0.04082	0	0.03125	0	0.08	0.10204	0.03597	0.05667	0	0.07895	0.00641	0	0.0125	0	0.01695	0.08974	0.23592	0.04114	0	0	0.08108	0	0.02632	0	0.08889	0.02632	0	0.02041	0	0.01282	0.17	0.02174	0.14935	0.04	0.0102	0.20833	0.17105	0.20833	0.4
	174	0.00091	0	0	0.01	0.03659	0	0	0.02885	0	0	0	0.01042	0	0	0	0.02698	0	0	0	0	0	0.025	0	0.00847	0.02564	0	0.01266	0	0	0	0	0.01316	0	0	0	0	0	0	0	0.02	0.02174	0	0	0.08163	0	0	0	0
	176	0.08634	0.09184	0.08	0.03	0.03659	0	0	0.04808	0	0.10204	0.03191	0.03125	0	0.09	0.02041	0.03597	0.03333	0.23333	0.01316	0.08333	0.00172	0.0125	0	0.02542	0.23077	0	0.13291	0.04545	0	0.01351	0	0.03947	0	0	0	0	0	0.06667	0.03846	0.04	0.04348	0	0	0.16327	0.01389	0	0	0
	178	0.00109	0.0102	0.03	0	0.03659	0.025	0	0.02885	0	0.02041	0.04255	0.0625	0.11224	0	0	0.0054	0.00667	0	0.09211	0	0.05498	0	0.025	0	0	0	0.00633	0	0.07143	0.16216	0	0.07895	0	0.01111	0	0	0	0	0	0.05	0.1087	0.00649	0	0	0.16667	0.02632	0	0
	180	0.00055	0	0	0.01	0.04878	0	0	0.01923	0	0.0102	0	0.02083	0	0	0.04082	0.08993	0	0	0	0	0.00172	0	0	0	0	0	0	0	0	0	0	0	0.03333	0	0	0	0	0.08333	0	0.05	0	0	0	0	0	0.01316	0	0
	182	0.002	0.03061	0	0	0	0	0	0.03846	0.025	0.0102	0	0.03125	0.07653	0.09	0.02041	0.09353	0	0.04444	0	0	0	0.1	0	0	0	0	0.00633	0	0	0	0	0.01316	0	0	0	0	0.0102	0	0	0.12	0.02174	0.02597	0.06	0	0.02778	0	0	0
	184	0.02404	0	0.01	0	0	0	0	0.01923	0.0125	0.02041	0	0.02083	0.0051	0	0.05102	0.02518	0.00667	0	0	0.00641	0	0	0	0	0	0	0	0	0	0	0	0.01316	0	0	0	0	0.02041	0.00833	0	0.01	0.04348	0.03896	0	0	0	0.03947	0.04167	0
	186	0.17523	0.04082	0.02	0	0.0122	0	0	0	0.0125	0	0.01064	0.03125	0	0.12	0	0.11511	0.04333	0	0	0	0	0.0125	0	0	0	0.00352	0	0	0	0	0	0.01316	0	0.06667	0	0	0	0.025	0	0.02	0	0	0	0	0	0	0	0
	188	0	0.0102	0	0	0	0	0	0.01923	0	0	0	0	0.03061	0	0	0.05216	0	0	0	0	0	0.025	0	0	0	0	0	0	0	0	0	0	0	0	0	0	0	0	0	0	0	0	0	0	0	0	0	0
	190	0	0	0	0	0	0	0	0	0	0	0	0	0	0	0	0.00719	0	0	0	0	0	0	0	0	0	0	0.01266	0	0	0	0	0	0	0	0	0	0	0	0	0	0.04348	0	0	0	0	0.03947	0	0
	194	0	0	0	0	0	0	0	0	0	0	0	0	0	0	0	0	0	0	0	0	0	0	0	0	0	0	0	0	0	0	0	0	0	0	0	0	0	0	0	0	0	0	0	0	0	0	0	0
	200	0	0	0	0	0	0	0	0	0	0	0	0	0	0	0	0	0	0	0	0	0	0	0	0	0	0	0	0	0	0	0	0	0	0	0	0	0	0	0	0	0	0	0	0	0	0	0	0
Csrm60	N	2746	49	50	50	44	20	12	52	41	49	47	49	98	50	49	279	150	45	38	78	291	40	20	59	39	142	158	22	14	37	85	38	15	45	30	24	49	60	45	49	26	80	50	49	37	38	14	12
	80	0	0	0	0	0	0	0	0	0	0	0	0	0	0	0	0	0	0	0	0	0	0	0	0	0	0	0	0	0	0	0	0	0	0	0	0	0	0	0	0	0	0	0	0	0	0	0	0
	82	0	0	0	0	0	0	0	0	0	0	0	0	0	0	0	0	0	0	0	0	0	0	0	0	0	0	0	0	0	0	0	0	0	0	0	0	0	0	0	0	0	0	0	0	0	0	0	0
	86	0	0	0	0	0	0	0	0.00962	0	0	0	0	0	0	0	0	0	0	0	0	0	0	0	0	0	0	0	0	0	0	0	0	0	0	0	0	0	0	0	0	0	0	0	0	0	0	0	0
	88	0	0	0	0	0	0	0	0	0	0	0	0	0	0.04	0	0	0	0	0	0	0	0	0	0	0	0.00352	0	0	0	0	0	0	0	0	0.06667	0	0	0.09167	0.01111	0	0	0	0.01	0.05102	0	0	0	0
	90	0	0	0	0	0	0	0	0.03846	0	0	0	0	0	0	0	0.00179	0	0	0	0	0	0	0	0	0	0	0	0	0.07143	0	0	0	0	0	0	0	0	0	0	0.03061	0	0	0	0	0	0	0	0
	92	0.14967	0.17347	0.36	0.34	0.19318	0.075	0	0.10577	0.10976	0.15306	0.28723	0.22449	0.0051	0.29	0.10204	0.05197	0.28	0.11111	0.07895	0.05128	0.16838	0.125	0.125	0.05085	0	0.03521	0.12342	0.02273	0.10714	0.27027	0.04118	0.22368	0.16667	0.06667	0.03333	0.0625	0.26531	0.11667	0.15556	0.11224	0.17308	0.125	0.3	0.18367	0.25676	0.15789	0.21429	0.08333
	94	0	0	0	0	0	0	0.25	0.02885	0.03659	0.02041	0	0	0	0	0	0.00538	0	0	0	0	0	0	0	0	0	0	0	0	0	0	0	0	0	0	0	0	0	0.00833	0	0	0	0	0	0	0.01351	0	0	0
	96	0.14785	0.11224	0.31	0.25	0.06818	0.325	0.08333	0.07692	0.17073	0.10204	0.03191	0.02041	0	0.11	0.16327	0.181	0.01	0.07778	0.02632	0.17949	0.00687	0.125	0.05	0.10169	0.05128	0.02465	0.03797	0	0.14286	0.16216	0.05294	0.10526	0	0.14444	0.08333	0.08333	0.07143	0.025	0.06667	0.04082	0.15385	0.0625	0	0.02041	0.04054	0.06579	0	0.25
	98	0.08212	0.11224	0.04	0.01	0.09091	0.025	0.20833	0.06731	0.17073	0.05102	0.04255	0.08163	0.56122	0.18	0.17347	0.19355	0.1	0.02222	0	0.0641	0.16667	0.225	0.3	0.01695	0.17949	0.33451	0.03165	0.45455	0	0.06757	0	0.15789	0.1	0	0.05	0.02083	0	0.275	0.02222	0.06122	0.09615	0.00625	0.05	0.04082	0.14865	0	0.03571	0
	100	0.09669	0.08163	0	0.05	0.10227	0	0	0.15385	0.03659	0.04082	0.11702	0.03061	0.01531	0.05	0.12245	0.03763	0.14333	0.41111	0.13158	0.28205	0.26632	0.2375	0.1	0.0678	0.42308	0.03873	0.06646	0.20455	0.21429	0.24324	0.07647	0.22368	0.1	0	0.25	0.02083	0.16327	0.05	0.08889	0.09184	0.11538	0.0625	0.09	0.12245	0.10811	0.02632	0	0
	102	0.52185	0.52041	0.28	0.35	0.48864	0.5	0.45833	0.39423	0.40244	0.54082	0.30851	0.5102	0.25	0.13	0.27551	0.38172	0.41667	0.27778	0.76316	0.30128	0.38488	0.25	0.425	0.67797	0.30769	0.45775	0.42722	0.31818	0.25	0.25676	0.82941	0.27632	0.63333	0.76667	0.48333	0.54167	0.28571	0.38333	0.3	0.45918	0.36538	0.575	0.33	0.53061	0.18919	0.47368	0.53571	0.375
	104	0.00164	0	0	0	0.05682	0.075	0	0.07692	0.03659	0.04082	0.18085	0.09184	0.04592	0.04	0.10204	0.1362	0.05	0.07778	0	0.09615	0.00687	0.0375	0	0.07627	0.03846	0.10563	0.31329	0	0.14286	0	0	0.01316	0	0.02222	0.03333	0	0.17347	0.05	0.13333	0.11224	0.09615	0.15625	0.21	0.02041	0.22973	0.23684	0.14286	0.25
	106	0.00018	0	0.01	0	0	0	0	0.00962	0	0	0.01064	0	0.02041	0	0.03061	0	0	0.02222	0	0	0	0	0	0.00847	0	0	0	0	0	0	0	0	0	0	0	0.14583	0.0102	0	0	0.02041	0	0.0125	0.01	0.03061	0	0	0	0
	108	0	0	0	0	0	0	0	0	0	0	0	0	0.10204	0.02	0	0	0	0	0	0	0	0	0	0	0	0	0	0	0	0	0	0	0	0	0	0	0	0	0	0	0	0	0	0	0	0.01316	0	0
	110	0	0	0	0	0	0	0	0.02885	0.03659	0.05102	0.02128	0.0102	0	0.01	0.02041	0	0	0	0	0.02564	0	0	0	0	0	0	0	0	0	0	0	0	0	0	0	0	0	0	0	0	0	0	0	0	0.01351	0.02632	0.03571	0.04167
	112	0	0	0	0	0	0	0	0.00962	0	0	0	0.03061	0	0.13	0.0102	0.01075	0	0	0	0	0	0	0	0	0	0	0	0	0	0	0	0	0	0	0	0	0	0	0	0	0	0	0	0	0	0	0.03571	0
	114	0	0	0	0	0	0	0	0	0	0	0	0	0	0	0	0	0	0	0	0	0	0	0	0	0	0	0	0	0.07143	0	0	0	0	0	0	0.125	0.03061	0	0.22222	0.07143	0	0	0	0	0	0	0	0
	116	0	0	0	0	0	0	0	0	0	0	0	0	0	0	0	0	0	0	0	0	0	0	0	0	0	0	0	0	0	0	0	0	0	0	0	0	0	0	0	0	0	0	0	0	0	0	0	0
Bm2113	N	2746	49	50	50	44	20	12	52	40	49	47	49	99	50	49	279	150	45	38	78	291	40	20	59	39	142	158	22	14	37	85	38	15	45	30	24	49	60	45	50	26	80	49	49	23	38	13	12
	119	0	0	0	0	0	0	0	0	0	0	0	0	0	0	0	0	0	0	0	0	0	0	0	0	0	0	0	0	0	0	0	0	0	0	0	0	0	0	0	0	0	0	0	0	0	0	0	0
	121	0	0.0102	0	0	0	0	0.58333	0.02885	0	0.0102	0	0.0102	0	0	0	0.02509	0	0	0	0	0	0	0	0	0	0	0	0	0	0	0	0	0	0	0	0	0	0	0	0.01	0	0	0	0	0	0	0	0
	123	0.00018	0	0	0	0	0	0	0	0	0	0	0	0	0	0	0	0	0	0	0	0	0	0	0	0	0	0	0	0	0	0	0	0	0	0	0	0.02041	0	0	0	0.05769	0	0	0	0	0	0	0
	125	0.27422	0.13265	0.05	0.16	0.14773	0.025	0	0.09615	0.05	0.12245	0.04255	0.05102	0.08081	0.03	0.03061	0.03405	0	0.32222	0.13158	0.07692	0.08419	0.125	0.25	0.0339	0	0.06338	0.01266	0.18182	0	0.27027	0.36471	0.18421	0.23333	0	0.01667	0.04167	0.09184	0	0.03333	0.04	0.13462	0.14375	0.14286	0.09184	0.13043	0.03947	0.03846	0.04167
	127	0.20284	0.16327	0.16	0.31	0.22727	0.25	0	0.11538	0.15	0.22449	0.25532	0.16327	0	0.02	0	0.0448	0.06667	0.16667	0	0.03846	0.0378	0.0875	0	0.08475	0.29487	0.09155	0.02215	0	0.10714	0.12162	0.11176	0.10526	0.43333	0.07778	0	0.1875	0.05102	0.11667	0.24444	0.27	0.01923	0.13125	0.18367	0.14286	0	0.02632	0	0.25
	129	0.00018	0	0	0.02	0.01136	0	0	0.01923	0.0125	0	0	0	0	0	0	0.00179	0.00667	0	0	0	0	0	0	0	0	0	0	0	0	0	0	0	0	0	0	0	0	0	0	0.01	0	0.04375	0.06122	0.03061	0.13043	0.02632	0.03846	0
	131	0.00018	0.03061	0	0	0.01136	0.025	0.16667	0.00962	0.025	0.03061	0.12766	0.03061	0	0	0.05102	0.0233	0.12667	0	0	0.19231	0	0	0	0.02542	0	0.00704	0.24684	0	0	0	0	0.01316	0	0.61111	0	0	0.0102	0.00833	0	0.01	0.01923	0.1125	0.05102	0.03061	0.04348	0.07895	0	0.08333
	133	0.0173	0.05102	0.15	0.05	0.17045	0.05	0	0.14423	0.15	0.13265	0.02128	0.14286	0.07071	0.02	0.19388	0.13978	0.14667	0.11111	0.35526	0.08974	0.22165	0.3375	0.55	0.64407	0	0.14437	0.16456	0.22727	0.25	0.12162	0.04118	0.17105	0	0.06667	0	0.0625	0.0102	0.05833	0.14444	0.15	0.07692	0.0375	0.15306	0.12245	0.1087	0.07895	0.03846	0
	135	0.34086	0.19388	0.03	0.11	0.14773	0.25	0	0.21154	0.1125	0.11224	0.18085	0.15306	0.07071	0.23	0.22449	0.15054	0.12667	0.03333	0.14474	0.25	0.28351	0.15	0.125	0.01695	0.01282	0.16197	0.20886	0.06818	0.42857	0.06757	0.29412	0.17105	0.1	0.04444	0.28333	0.25	0.44898	0.25833	0.16667	0.25	0.32692	0.25	0.13265	0.2449	0.17391	0.19737	0.26923	0.125
	137	0.07902	0.30612	0.35	0.08	0.18182	0.275	0.25	0.17308	0.25	0.07143	0.08511	0.16327	0.43434	0.14	0.13265	0.28315	0.19333	0.11111	0.30263	0.21154	0.36942	0.1375	0	0.16102	0.53846	0.04577	0.07911	0.34091	0.10714	0.2027	0	0.18421	0.1	0.03333	0.01667	0.02083	0.16327	0.15833	0.11111	0.16	0.17308	0.14375	0.09184	0.23469	0.1087	0.42105	0.38462	0.29167
	139	0.08521	0.11224	0.25	0.26	0.10227	0.125	0	0.07692	0.25	0.26531	0.2766	0.23469	0.34343	0.46	0.30612	0.28136	0.16	0.25556	0.06579	0.14103	0.00344	0.1625	0.075	0.0339	0.15385	0.39085	0.23418	0.18182	0.07143	0.21622	0.18824	0.17105	0.13333	0.16667	0.01667	0.35417	0.14286	0.39167	0.24444	0.06	0.19231	0.08125	0.07143	0.02041	0.30435	0.09211	0.19231	0.125
	141	0	0	0.01	0.01	0	0	0	0.125	0	0.03061	0.01064	0.05102	0	0.09	0.06122	0.01613	0	0	0	0	0	0	0	0	0	0.09155	0	0	0.03571	0	0	0	0	0	0.66667	0.08333	0.04082	0.00833	0.05556	0.04	0	0.05625	0.11224	0.08163	0	0.03947	0.03846	0.08333
	143	0	0	0	0	0	0	0	0	0	0	0	0	0	0.01	0	0	0.17333	0	0	0	0	0	0	0	0	0.00352	0.03165	0	0	0	0	0	0	0	0	0	0.02041	0	0	0	0	0	0	0	0	0	0	0
	146	0	0	0	0	0	0	0	0	0	0	0	0	0	0	0	0	0	0	0	0	0	0	0	0	0	0	0	0	0	0	0	0	0	0	0	0	0	0	0	0	0	0	0	0	0	0	0	0
	147	0	0	0	0	0	0	0	0	0	0	0	0	0	0	0	0	0	0	0	0	0	0	0	0	0	0	0	0	0	0	0	0	0	0	0	0	0	0	0	0	0	0	0	0	0	0	0	0
Bm1824	N	2746	49	50	50	42	20	12	52	41	49	47	49	99	50	49	278	150	45	38	78	291	40	20	59	39	141	158	22	14	37	85	38	15	45	28	24	49	60	45	50	26	80	50	49	37	38	14	12
	172	0	0	0	0	0	0	0	0	0	0	0	0	0	0	0	0	0	0	0	0	0	0	0	0	0	0	0	0	0	0	0	0	0	0	0	0	0	0	0	0	0	0	0	0	0	0	0	0
	174	0	0	0	0.13	0	0	0	0	0.0122	0	0	0	0	0	0	0	0	0	0	0	0	0	0	0	0	0	0	0	0	0	0	0	0	0	0	0	0	0	0	0.01	0	0	0	0	0	0	0	0
	178	0.25619	0.22449	0.26	0.2	0.32143	0.25	0	0.05769	0.13415	0.18367	0.18085	0.18367	0.16162	0.03	0.15306	0.04317	0.26333	0.12222	0.11842	0.19231	0.32302	0.0625	0.125	0.28814	0.01282	0.26241	0.31962	0.31818	0	0.28378	0.1	0.30263	0.03333	0.21111	0.14286	0.10417	0.02041	0.225	0.13333	0.07	0.11538	0.16875	0.27	0.2551	0.16216	0.28947	0.07143	0.16667
	180	0.19538	0.16327	0.06	0.11	0.09524	0.2	0.625	0.26923	0.15854	0.2449	0.12766	0.22449	0	0.41	0.32653	0.21763	0.21333	0.08889	0.02632	0.15385	0.12887	0.2	0.05	0.18644	0.07692	0.03546	0.18038	0.11364	0	0.04054	0.87059	0.02632	0.43333	0.22222	0.23214	0.14583	0.30612	0.08333	0.08889	0.19	0.40385	0.24375	0.3	0.19388	0.16216	0.13158	0.14286	0.375
	182	0.19028	0.30612	0.36	0.28	0.27381	0.025	0	0.40385	0.40244	0.19388	0.18085	0.26531	0.78283	0.56	0.34694	0.38129	0.16333	0.34444	0.35526	0.41667	0.35739	0.35	0.6	0.33898	0.85897	0.50355	0.0443	0.25	0.46429	0.28378	0	0.40789	0.1	0.12222	0.10714	0.41667	0.36735	0.425	0.42222	0.35	0.19231	0.3875	0.17	0.12245	0.40541	0.40789	0.57143	0.25
	184	0	0	0	0	0	0	0	0	0.02439	0	0	0	0	0	0	0	0	0	0	0	0	0	0.05	0	0	0	0	0	0	0	0	0	0	0	0	0	0.07143	0	0	0	0	0	0	0	0	0	0	0
	186	0.00018	0	0	0.01	0	0	0.04167	0.04808	0	0	0	0	0	0	0	0.02158	0	0	0	0	0	0	0	0	0	0	0	0	0	0	0	0	0	0	0	0	0.06122	0	0	0	0	0	0	0	0	0	0	0
	188	0.32484	0.29592	0.32	0.27	0.30952	0.525	0	0.22115	0.2561	0.34694	0.44681	0.31633	0.05556	0	0.17347	0.30576	0.36	0.44444	0.46053	0.21795	0.19072	0.3875	0.15	0.18644	0.05128	0.17376	0.45253	0.31818	0.53571	0.39189	0.02941	0.26316	0.43333	0.41111	0.51786	0.33333	0.17347	0.26667	0.33333	0.38	0.26923	0.19375	0.26	0.41837	0.16216	0.17105	0.17857	0.20833
	190	0.03314	0.0102	0	0	0	0	0.33333	0	0.0122	0.03061	0.06383	0.0102	0	0	0	0.01978	0	0	0.03947	0.01923	0	0	0.025	0	0	0.02482	0.00316	0	0	0	0	0	0	0.03333	0	0	0	0	0.02222	0	0.01923	0	0	0.0102	0.10811	0	0.03571	0
	192	0	0	0	0	0	0	0	0	0	0	0	0	0	0	0	0.01079	0	0	0	0	0	0	0	0	0	0	0	0	0	0	0	0	0	0	0	0	0	0	0	0	0	0.00625	0	0	0	0	0	0
	194	0	0	0	0	0	0	0	0	0	0	0	0	0	0	0	0	0	0	0	0	0	0	0	0	0	0	0	0	0	0	0	0	0	0	0	0	0	0	0	0	0	0	0	0	0	0	0	0
	196	0	0	0	0	0	0	0	0	0	0	0	0	0	0	0	0	0	0	0	0	0	0	0	0	0	0	0	0	0	0	0	0	0	0	0	0	0	0	0	0	0	0	0	0	0	0	0	0
Eth10	N	2746	49	50	50	44	20	12	52	40	49	47	49	99	50	49	279	150	45	38	77	291	40	20	59	39	141	158	22	14	37	85	38	15	45	30	24	40	60	45	50	24	80	50	49	33	38	14	12
	203	0	0	0	0	0	0	0	0	0	0	0	0	0	0	0	0	0	0	0	0	0	0	0	0	0	0	0	0	0	0	0	0	0	0	0	0	0	0	0	0	0	0	0	0	0	0	0	0
	205	0	0	0	0	0	0	0	0	0	0	0	0	0	0	0	0	0	0	0	0	0	0	0	0	0	0	0	0	0	0	0	0	0	0	0	0	0	0	0	0	0	0	0	0	0	0	0	0
	207	0	0	0	0	0	0	0	0	0	0	0	0	0	0	0	0	0	0	0	0	0	0	0	0	0	0	0	0	0	0	0	0	0	0	0	0	0	0	0	0	0	0	0	0	0	0	0	0
	209	0.02403	0.04082	0	0	0.02273	0	0	0	0.0125	0	0.01064	0	0	0.05	0	0.00896	0	0.03333	0	0	0	0	0	0.02542	0	0	0	0	0	0	0	0	0	0	0	0	0	0.00833	0	0	0	0	0	0	0	0.01316	0.03571	0
	211	0	0	0	0	0.01136	0	0.5	0	0.0125	0.0102	0	0	0	0	0	0.00717	0	0	0	0	0	0	0	0	0	0	0	0	0	0	0	0	0	0	0	0	0.0125	0	0	0	0.02083	0.025	0	0	0	0.01316	0.07143	0.04167
	213	0.09177	0.03061	0.19	0.01	0.03409	0.05	0	0.05769	0.0375	0.0102	0.04255	0.02041	0.00505	0.05	0.0102	0.0681	0.02	0.01111	0	0	0.01546	0.0125	0.15	0	0	0.01064	0.00633	0	0	0.04054	0	0	0.03333	0.01111	0	0	0.0875	0	0	0.02	0.0625	0.00625	0.1	0.03061	0	0.05263	0	0.08333
	215	0.00801	0.03061	0.14	0.01	0	0	0.45833	0.00962	0.25	0.05102	0.01064	0.02041	0	0	0	0.00538	0	0.06667	0	0.00649	0.03265	0.025	0	0.00847	0	0.08511	0.03797	0.25	0	0	0	0.02632	0.03333	0	0	0	0	0.04167	0	0.08	0.10417	0.15625	0.05	0.02041	0	0.01316	0	0.08333
	217	0.13838	0.2551	0.09	0.43	0.31818	0.55	0	0.20192	0.2625	0.2449	0.56383	0.27551	0.07071	0.12	0.17347	0.21685	0.33	0.41111	0.44737	0.85065	0.28007	0.1625	0.15	0.19492	0.26923	0.25532	0.20886	0.13636	0.17857	0.25676	0.23529	0.26316	0.2	0.82222	0.4	0.10417	0.1125	0.73333	0.66667	0.36	0.20833	0.03125	0.07	0.27551	0.09091	0.23684	0.25	0.04167
	219	0.56701	0.39796	0.55	0.38	0.22727	0.05	0	0.51923	0.225	0.36735	0.15957	0.43878	0.61111	0.62	0.55102	0.45878	0.28	0.4	0.21053	0.1039	0.28007	0.375	0.575	0.70339	0	0.21986	0.26582	0.11364	0.67857	0.51351	0.3	0.60526	0	0.15556	0.45	0.5625	0.3375	0.10833	0.2	0.32	0.375	0.5125	0.4	0.37755	0.72727	0.31579	0.39286	0.375
	221	0.02203	0.09184	0.02	0.05	0.26136	0.1	0	0.18269	0.05	0.16327	0.11702	0.14286	0.08081	0.13	0.11224	0.18638	0.27333	0	0.02632	0.01948	0.29553	0.125	0	0.05085	0.37179	0.42908	0.29114	0.31818	0.07143	0	0.46471	0	0.03333	0.01111	0.1	0.1875	0.3375	0	0.11111	0.15	0.1875	0.08125	0.33	0.06122	0.09091	0.18421	0.25	0.125
	223	0.04953	0.06122	0.01	0.05	0.11364	0.25	0.04167	0.02885	0.1125	0.14286	0.08511	0.10204	0	0.02	0.0102	0.0233	0.09667	0.06667	0.28947	0.01299	0.08247	0.15	0.05	0.01695	0.35897	0	0.0981	0.15909	0.07143	0.17568	0	0.10526	0	0	0.05	0.14583	0.0875	0.10833	0.01111	0.05	0.02083	0.00625	0.05	0.12245	0.09091	0.05263	0	0.04167
	225	0.09924	0.09184	0	0.07	0.01136	0	0	0	0.0375	0.0102	0.01064	0	0.23232	0.01	0.14286	0.02509	0	0.01111	0.02632	0.00649	0.01375	0.15	0.075	0	0	0	0.09177	0.02273	0	0.01351	0	0	0.7	0	0	0	0.025	0	0.01111	0.02	0.02083	0.18125	0	0.11224	0	0.11842	0	0.20833
	227	0	0	0	0	0	0	0	0	0	0	0	0	0	0	0	0	0	0	0	0	0	0	0	0	0	0	0	0	0	0	0	0	0	0	0	0	0	0	0	0	0	0	0	0	0	0	0	0
[truncated: 107 more columns]

## Sheet: PIC
	Holstein	Tagil	Kholmogory	RedGorbatov	BrownSwiss	Kostroma	Altai-Rus	Kalmyk	AulieAta	Alatau	Kyrgyzbeeftype	Kyrgyznative	Yakut	Khogorogo	Gobibreeds	Buryat	BlondeDAquitaine	BelgianBlue	BrandroodCattle	Charolais	Dexter	DutchFriesian	GroningenWhiteheaded	Galloway	HeckCattle	Hereford	Limousin	DutchBelted	Marchigiana	MaasRijnIJssel	ScottischHighlander	VerbeterdRoodbont	Wagyu	WaldviertlerBlondvieh	Chianina	Romagnola	Modicana	HungarianGrey	Istrian	Podolica	Cinisara	TexasLonghorn	FloridaCracker	Pineywoods	CriolloLecheroTropical	CriolloPoblano	CriolloBajaCalifornia	CriolloChihuahua	CriolloNayarit
Eth3	0.593356176344208	0.645669512269374	0.70947102	0.70362244	0.628299775405966	0.4445578125	0.37060546875	0.743627571524544	0.709395539820954	0.720223581872124	0.565019234863918	0.662613267136194	0.594385190606819	0.59739694	0.678085917449709	0.728244446437638	0.651891962962963	0.799326748971193	0.366276288453127	0.594655084406734	0.630111237234689	0.63228759765625	0.6491265625	0.364659712209614	0.611108463539809	0.41012411495672	0.613382782302494	0.360315210709651	0.503745184298209	0.732590009609633	0.560073722776308	0.673626504458222	0.550585185185185	0.555131047096479	0.62532890039461	0.280617042824074	0.748143994909798	0.601907860725309	0.695432342630697	0.66938916	0.7195394287665	0.637419861848298	0.82981764	0.722837158646066	0.717677210148034	0.733120165782951	0.825700879841733	0.774215133101852	0.80799244068287
Cssm66	0.735584703959382	0.803338094411238	0.73612254	0.78797188	0.824256972724842	0.82204921875	0.634783709490741	0.806763272305329	0.851547468097974	0.820568394294964	0.838342224624929	0.800318280717756	0.58248310207951	0.78189058	0.701252350254588	0.764800715360236	0.83296406962963	0.832466575217192	0.688910039920658	0.724392639713959	0.732426923015783	0.721067138671875	0.7765515625	0.761547687652452	0.610290904328228	0.832895048573568	0.814552388422825	0.539521933269585	0.589256429612661	0.740271180010682	0.62770174447145	0.768205647017749	0.558367901234568	0.764520134125895	0.385838989613703	0.746413619429977	0.800533530992657	0.734438213734568	0.714649851551294	0.8024205	0.774670606333812	0.788194464858751	0.82711458	0.839858760952893	0.739984251619791	0.803957184506456	0.829630831227375	0.835615736630012	0.766107360965691
ilsts006	0.619716517547686	0.725691595195252	0.727230176722492	0.7365834	0.7315248046875	0.6662640625	0.327829619984568	0.73644872077527	0.734614152684248	0.73381381681692	0.721199731088979	0.72544156337747	0.710728376333772	0.55908516	0.73043776792989	0.710676968631739	0.705412621975309	0.628598414875781	0.717145488351839	0.818555515625858	0.709467038013316	0.676067236328125	0.5899265625	0.601747855824383	0.576161657029507	0.68693223173887	0.65206837649259	0.721041296701045	0.591859511661808	0.719381232455483	0.569991724237018	0.668061100091313	0.383256790123457	0.735265386374028	0.67157854775977	0.659850484572709	0.685493675323745	0.612535358796296	0.702009490965698	0.743719622758878	0.78314369901264	0.840616385980883	0.745422478590328	0.707263550814677	0.651255476960359	0.705729092244894	0.699841199371628	0.727452018304761	0.787833503426155
Tgla227	0.837378464141196	0.849876979788981	0.77350018	0.78645924	0.841063636043474	0.80423203125	0.327829619984568	0.809435133765231	0.852483853022248	0.862008983484426	0.84216924221071	0.851803492436252	0.738813683236098	0.79052052	0.855978658239894	0.857330512901762	0.793285995555556	0.751648254839201	0.797282287582201	0.788133192342057	0.737988233230797	0.809622216796875	0.67045546875	0.823595387229942	0.641696233013939	0.728747647895175	0.797754593405082	0.656184366675774	0.675428206997085	0.76474039583579	0.703120381700411	0.726408373362697	0.652748148148148	0.797155372656607	0.737432407407407	0.755065376410176	0.810814219779659	0.768556963734568	0.832093461362597	0.846579005936198	0.832939257203879	0.796463333129883	0.78079492	0.819519463898233	0.841650785060395	0.812535129603057	0.766543538391513	0.764425395447531	0.862420279523257
Tgla122	0.786525564451382	0.855616980534107	0.5327106	0.7566813	0.685813310278072	0.654946875	0.737214265046296	0.755325652359205	0.635509691017747	0.80352463597616	0.734055899350798	0.826966186690573	0.663818427165859	0.81147412	0.687935520237385	0.801097877724958	0.804608063703704	0.658945953360768	0.645151743099731	0.725534826963385	0.396586026414788	0.7521431640625	0.49394296875	0.495459881900028	0.762677003649542	0.663181554860046	0.79200055640703	0.767575323577624	0.460117529154519	0.750449201002475	0.567053483555034	0.771016614743595	0.614740740740741	0.586817924096936	0.691231018518518	0.767373544198495	0.617558632986637	0.693735358796296	0.803910836762689	0.64572504	0.72961152	0.790285299682617	0.74078212	0.51613078231148	0.668389882192618	0.797405181244773	0.706080844508245	0.768530574845679	0.758881309336794
Sps115	0.568611187701267	0.60274621795271	0.70010238	0.39927252	0.610630810546875	0.54053203125	0.566255545910494	0.627586312656463	0.644068137751211	0.555309931773881	0.558239027305269	0.652815877772711	0.26817880755095	0.58144612	0.607408694593274	0.695060439813636	0.504850208148148	0.261589727175735	0.519610171710622	0.537407828722453	0.738902219558881	0.358608544921875	0.22011796875	0.696933794000195	0.21292627518921	0.723342030371289	0.668582160851283	0.0830117478314321	0.41206463452728	0.478518854570125	0.565662638138911	0.486884248797201	0.726762962962963	0.615944734034446	0.423400853485527	0.681178923912301	0.618408508670956	0.668519849537037	0.568667731562906	0.71795182	0.644848482108411	0.671799948120117	0.57790974	0.711731831679879	0.652050548931752	0.738450231863751	0.825378138020377	0.683534253124787	0.631034230152122
Eth225	0.665575285730325	0.723106378693731	0.55007812	0.77138292	0.764070410683184	0.6491265625	0.515763647762346	0.781363688957407	0.722470601724633	0.737684158568527	0.681767978275629	0.742942449357749	0.637999956402067	0.5441434	0.71584142713686	0.706039186531237	0.725564995308642	0.699358116140832	0.458263573694953	0.572588431988324	0.686761283496756	0.63130517578125	0.4979578125	0.723567233409981	0.546393175793115	0.724339604024031	0.660394037434736	0.583382602793525	0.689058595376926	0.572277074915122	0.695310647621556	0.718489465435348	0.528362962962963	0.590014540466392	0.650710185185185	0.555363134780107	0.674996999029108	0.623740219907407	0.721470659960372	0.72790324	0.672501126973846	0.749108084106445	0.75559774	0.752387853457561	0.691930549189744	0.745678519290828	0.691801593086214	0.784975405092593	0.718626827376975
Tgla53	0.859753074196663	0.850730233359313	0.8692893	0.80388216	0.808184591690522	0.78434296875	0.75023509837963	0.871360106985925	0.833290283203125	0.873745620187063	0.811744994191219	0.882177541285385	0.633930545965507	0.79380366	0.844687136641837	0.910813989917992	0.829722526666667	0.803545861911294	0.804437276513378	0.867714049250662	0.735997800881605	0.8770662109375	0.4404203125	0.694429546169335	0.751172117637753	0.716102897349648	0.837921295417203	0.772984469981559	0.597228368388172	0.812805503369241	0.542385754480909	0.886897725136394	0.663451851851852	0.836598231976833	0.432005394372357	0.469467259731086	0.755282164119802	0.760088975694445	0.763523361953039	0.85195222	0.805900046812297	0.82249605731123	0.75650658	0.818858491385912	0.833859718530902	0.868915205051373	0.801558883101852	0.5958	0.746443397457048
Csrm60	0.631912574063147	0.631094160925937	0.63286686	0.63715188	0.6643066906504	0.5711640625	0.622775607638889	0.770750200776408	0.733945165567789	0.638534834073197	0.73790266720304	0.634507982148907	0.559933251056715	0.81182578	0.809015306859682	0.728310853815969	0.670346465679012	0.689370827617741	0.364870205108923	0.748493609600374	0.677481015878259	0.767073779296875	0.65307421875	0.494481956508517	0.635959756483956	0.607748283776465	0.648782067439731	0.581837284850762	0.806900119741774	0.73245488247808	0.287433440691562	0.753776372380507	0.511471604938272	0.355877061423563	0.648852160493827	0.627858103057485	0.752164255106117	0.714663831018518	0.779441030330742	0.722822457358025	0.752762180070726	0.588119357299805	0.70376146	0.631215609177142	0.782546763591815	0.645944377249254	0.60019913577676	0.678090036651235	0.762484703534915
Bm2113	0.713929337543352	0.782800763634339	0.72750162	0.75941748	0.809269059543832	0.7453828125	0.504533179012346	0.843119393852194	0.788481591796875	0.805214893801191	0.771050069666439	0.821844609206805	0.622051095132073	0.66758788	0.763809583366364	0.764956583638755	0.830006779259259	0.743804481024234	0.696885119244021	0.795959457011223	0.677698141623481	0.76781337890625	0.56024921875	0.518093368267233	0.530883811171324	0.75221805537481	0.777232712742946	0.722798455535824	0.686517336526447	0.776597234709291	0.685020713353528	0.810241754015086	0.680340740740741	0.553416918152721	0.402211419753086	0.729083025896991	0.710604104113915	0.697616984953704	0.789708702941625	0.78347202	0.77136682232765	0.836930227661133	0.858738857594564	0.811370461877175	0.794659735349716	0.732999310356735	0.695865866041105	0.779477719907407	0.82657312463831
Bm1824	0.710758919978111	0.694477983715309	0.6367344	0.74451684	0.662211178405603	0.55927421875	0.407980082947531	0.659962842003738	0.686175732837986	0.704225588185958	0.675387258921229	0.699094448359969	0.322016144695417	0.41110062	0.668117837025077	0.659491914743114	0.679741159259259	0.599438225880201	0.580817869913521	0.672592495199791	0.662493857052675	0.622394091796875	0.56359921875	0.683531009763595	0.240562597014577	0.589803972677216	0.595394477886323	0.669455104671812	0.373721235943357	0.620232333294738	0.21472400713593	0.605433350630367	0.534444444444444	0.676354275262917	0.596133243635464	0.62582849573206	0.688092854376066	0.635317814429012	0.629374302697759	0.63432084	0.665220657102342	0.676702886962891	0.69213102	0.657985288650901	0.709302989444343	0.65105627402721	0.574496954394003	0.676787953317901	0.65544452028116
Eth10	0.610002133324131	0.720563923195267	0.59191716	0.60048354	0.725977202825114	0.571125	0.431562258873457	0.606363661603673	0.770950048828125	0.718067674842549	0.601209715348196	0.653219144078	0.510756445625878	0.54965956	0.592099579846729	0.660602025016224	0.678068361234568	0.59984983996342	0.610740018876467	0.24841783247145	0.703706019356605	0.741108544921875	0.57934921875	0.422234449398677	0.586074326079636	0.642525793359074	0.747896603981067	0.745360844546138	0.457983001874219	0.58126129505416	0.565936851809724	0.491619731278919	0.423925925925926	0.266442889803384	0.5510875	0.571027590904707	0.703840283203125	0.40939631558642	0.455200457247371	0.69383406	0.732446364414545	0.634788088989258	0.66539028	0.712260015566886	0.419643466976299	0.760590795996041	0.66431304664723	0.755407262731482	0.789866883077739
mean	0.694425328248404	0.74047606863963	0.682293696393541	0.707285466666667	0.729634036957115	0.651083138020833	0.516447341981739	0.751008879797116	0.746911022196076	0.747743509489746	0.711507336920863	0.746145403547314	0.570424585487555	0.658327861666667	0.721222481631774	0.748952126211105	0.725538600781893	0.672328585581466	0.60419917353912	0.674537080274689	0.674134982979803	0.696379756673177	0.557897591145833	0.606690156861163	0.558825526744216	0.673163436246409	0.717163504398609	0.600289053428728	0.570323346175205	0.690131599775402	0.548701259164362	0.696721740612283	0.569038271604938	0.611128209622517	0.567984218384955	0.622427216787514	0.713827768550966	0.660043145576132	0.704623519163899	0.736674165504425	0.740412515927221	0.736076999662609	0.744497284682074	0.725118272368234	0.708579281499648	0.749698455601443	0.72345090920067	0.735359290762936	0.759475715037753
[truncated: 107 more columns]
