# Supplementary material for: Genetic Structure Analysis of 155 Transboundary and Local Populations of Cattle (Bos taurus, Bos indicus and Bos grunniens) Based on STR Markers
Source: Int J Mol Sci. 2023 Mar 6;24(5):5061. doi: 10.3390/ijms24055061 (PMC10003406; doi:10.3390/ijms24055061)
Supplement: Supplementary file 1 [file ijms-24-05061-s001.zip › Table S2.xlsx]

## Sheet: Nei’s Pairwise Fst values.
Breed	Hungarian Grey	Istrian	Romagnola	Chianina	Marchigiana	Cinisara	Modicana	Podolica	Kalmyk	Kyrgyz native	Kyrgyz Beef-type	Alatau	Aulie-Ata	Buryat	Gobi	Khogorogo	Yakut	Wagyu		Breed	Hungarian Grey	Istrian	Romagnola	Chianina	Marchigiana	Cinisara	Modicana	Podolica	Kalmyk	Kyrgyz native	Kyrgyz Beef-type	Alatau	Aulie-Ata	Buryat	Gobi	Khogorogo	Yakut	Wagyu
Hungarian Grey	0																			Hungarian Grey	0
Istrian	0.0304199	0																		Istrian	0.000999001	0
Romagnola	0.0549889	0.0449674	0																	Romagnola	0.000999001	0.000999001	0
Chianina	0.0713235	0.0674877	0.0779953	0																Chianina	0.000999001	0.000999001	0.000999001	0
Marchigiana	0.0394179	0.0418863	0.0649293	0.0497934	0															Marchigiana	0.000999001	0.000999001	0.000999001	0.000999001	0
Cinisara	0.0424343	0.03137	0.0531732	0.0646187	0.0421045	0														Cinisara	0.000999001	0.000999001	0.000999001	0.000999001	0.000999001	0
Modicana	0.0612595	0.0365555	0.0462037	0.0771521	0.0402596	0.0191752	0													Modicana	0.000999001	0.000999001	0.000999001	0.000999001	0.000999001	0.023976	0
Podolica	0.0365625	0.0194537	0.0327116	0.0567479	0.0280952	0.0166628	0.0270357	0												Podolica	0.000999001	0.027972	0.000999001	0.000999001	0.001998	0.147852	0.001998	0
Kalmyk	0.043279	0.0270123	0.0360866	0.0576116	0.0291628	0.0143474	0.0229356	0.0128387	0											Kalmyk	0.000999001	0.000999001	0.000999001	0.000999001	0.000999001	0.034965	0.000999001	0.036963	0
Kyrgyz native	0.0359483	0.0278039	0.0391344	0.0614659	0.037688	0.0229232	0.0404562	0.0187527	0.0136926	0										Kyrgyz native	0.000999001	0.000999001	0.000999001	0.000999001	0.000999001	0.00599401	0.000999001	0.002997	0.00599401	0
Kyrgyz Beef-type	0.0314796	0.0175005	0.0477958	0.0673095	0.0445058	0.0301216	0.0479377	0.0245849	0.0296438	0.016337	0									Kyrgyz Beef-type	0.000999001	0.00799201	0.000999001	0.000999001	0.000999001	0.000999001	0.000999001	0.000999001	0.000999001	0.00499501	0
Alatau	0.0344325	0.0265901	0.0377678	0.0601004	0.0364925	0.021202	0.0389024	0.0192286	0.0158051	0.00500497	0.0151858	0								Alatau	0.000999001	0.000999001	0.000999001	0.000999001	0.000999001	0.00499501	0.000999001	0.00799201	0.002997	0.470529	0.003996	0
Aulie-Ata	0.0441563	0.0310332	0.0489769	0.0808019	0.0508786	0.0242943	0.0382186	0.0211102	0.0192933	0.0198964	0.0293168	0.0195333	0							Aulie-Ata	0.000999001	0.000999001	0.000999001	0.000999001	0.000999001	0.002997	0.000999001	0.002997	0.001998	0.001998	0.000999001	0.000999001	0
Buryat	0.0220612	0.0178956	0.0133466	0.0227081	0.00913327	0.00863415	0.0203476	0.0115144	0.00766424	0.00909464	0.0177167	0.0100532	0.0112398	0						Buryat	0.001998	0.00599401	0.021978	0.000999001	0.0949051	0.370629	0.001998	0.0979021	0.123876	0.0649351	0.001998	0.033966	0.017982	0
Gobi	0.0422231	0.0370757	0.0489026	0.0685612	0.0353055	0.027469	0.0393673	0.028955	0.0208499	0.0229215	0.0408226	0.0260565	0.0331471	0.00877152	0					Gobi	0.000999001	0.000999001	0.000999001	0.000999001	0.000999001	0.000999001	0.000999001	0.000999001	0.000999001	0.000999001	0.000999001	0.000999001	0.000999001	0.104895	0
Khogorogo	0.0645175	0.0638428	0.0653676	0.098777	0.059977	0.047924	0.0503492	0.0534017	0.0369417	0.049477	0.0748725	0.0535701	0.0567392	0.0150702	0.029346	0				Khogorogo	0.000999001	0.000999001	0.000999001	0.000999001	0.000999001	0.000999001	0.000999001	0.000999001	0.000999001	0.000999001	0.000999001	0.000999001	0.000999001	0.00799201	0.000999001	0
Yakut	0.103904	0.0976334	0.0734802	0.111941	0.0624452	0.069553	0.091127	0.0850971	0.0729751	0.076694	0.103684	0.087241	0.076526	0.0429733	0.0569872	0.0628214	0			Yakut	0.000999001	0.000999001	0.000999001	0.000999001	0.000999001	0.000999001	0.000999001	0.000999001	0.000999001	0.000999001	0.000999001	0.000999001	0.000999001	0.000999001	0.000999001	0.000999001	0
Wagyu	0.0642373	0.0690416	0.118167	0.125167	0.138568	0.0833926	0.0672734	0.0533622	0.0526248	0.0544124	0.0660962	0.057411	0.0666683	0.0154714	0.0618123	0.0712172	0.0686633	0		Wagyu	0.000999001	0.000999001	0.000999001	0.000999001	0.000999001	0.000999001	0.000999001	0.000999001	0.000999001	0.000999001	0.000999001	0.000999001	0.000999001	0.00899101	0.000999001	0.000999001	0.000999001	0
Notation: the lower triangle shows the pairwise Fst values. The pairwise Fst values marked by red, yellow or grey show non-significant differences with p-values greater than 0.05, 0.01, or 0.005, respectively.
Breed	Hungarian Grey	Istrian	Romagnola	Chianina	Marchigiana	Cinisara	Modicana	Podolica	Kalmyk	Kyrgyz native	Kyrgyz Beef-type	Alatau	Aulie-Ata	Buryat	Gobi	Khogorogo	Yakut	Wagyu
Hungarian Grey	0
Istrian	0.000999001	0
Romagnola	0.000999001	0.000999001	0
Chianina	0.000999001	0.000999001	0.000999001	0
Marchigiana	0.000999001	0.000999001	0.000999001	0.000999001	0
Cinisara	0.000999001	0.000999001	0.000999001	0.000999001	0.000999001	0
Modicana	0.000999001	0.000999001	0.000999001	0.000999001	0.000999001	0.023976	0
Podolica	0.000999001	0.027972	0.000999001	0.000999001	0.001998	0.147852	0.001998	0
Kalmyk	0.000999001	0.000999001	0.000999001	0.000999001	0.000999001	0.034965	0.000999001	0.036963	0
Kyrgyz native	0.000999001	0.000999001	0.000999001	0.000999001	0.000999001	0.00599401	0.000999001	0.002997	0.00599401	0
Kyrgyz Beef-type	0.000999001	0.00799201	0.000999001	0.000999001	0.000999001	0.000999001	0.000999001	0.000999001	0.000999001	0.00499501	0
Alatau	0.000999001	0.000999001	0.000999001	0.000999001	0.000999001	0.00499501	0.000999001	0.00799201	0.002997	0.470529	0.003996	0
Aulie-Ata	0.000999001	0.000999001	0.000999001	0.000999001	0.000999001	0.002997	0.000999001	0.002997	0.001998	0.001998	0.000999001	0.000999001	0
Buryat	0.001998	0.00599401	0.021978	0.000999001	0.0949051	0.370629	0.001998	0.0979021	0.123876	0.0649351	0.001998	0.033966	0.017982	0
Gobi	0.000999001	0.000999001	0.000999001	0.000999001	0.000999001	0.000999001	0.000999001	0.000999001	0.000999001	0.000999001	0.000999001	0.000999001	0.000999001	0.104895	0
Khogorogo	0.000999001	0.000999001	0.000999001	0.000999001	0.000999001	0.000999001	0.000999001	0.000999001	0.000999001	0.000999001	0.000999001	0.000999001	0.000999001	0.00799201	0.000999001	0
Yakut	0.000999001	0.000999001	0.000999001	0.000999001	0.000999001	0.000999001	0.000999001	0.000999001	0.000999001	0.000999001	0.000999001	0.000999001	0.000999001	0.000999001	0.000999001	0.000999001	0
Wagyu	0.000999001	0.000999001	0.000999001	0.000999001	0.000999001	0.000999001	0.000999001	0.000999001	0.000999001	0.000999001	0.000999001	0.000999001	0.000999001	0.00899101	0.000999001	0.000999001	0.000999001	0
Notation: the lower triangle shows p-values for the pairwise Fst values.
